# Supplementary material for: Antitumor activity and expression profiles of genes induced by sulforaphane in human melanoma cells
Source: Springer Nature journal article supplement (doi:10.1007/s00394-017-1527-7), 2017-09-01
Supplement: MOESM1 [file 14966272]

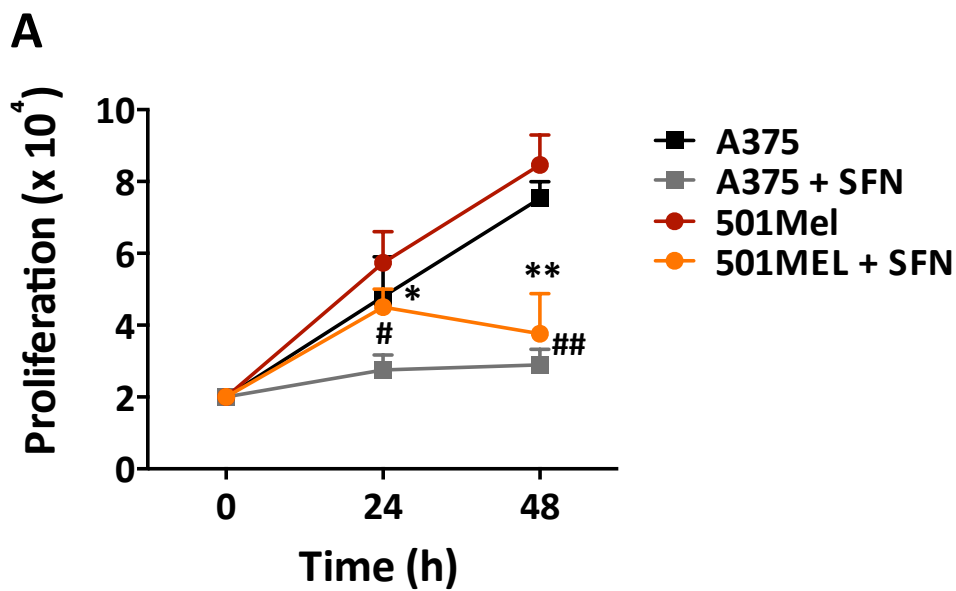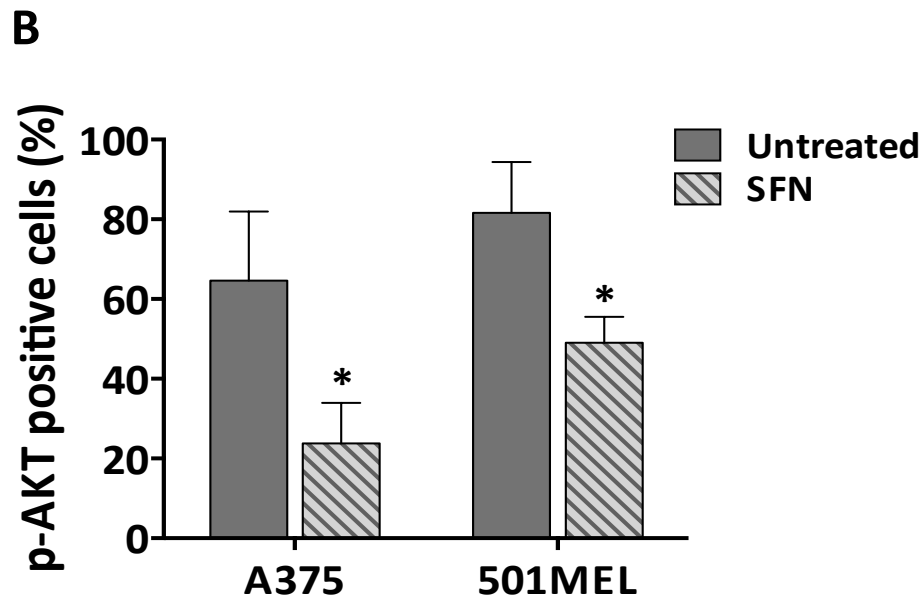

**Figure S1.** SFN reduces cell viability and proliferation. (A) A375 and 501MEL treated with 2  $\mu\text{g/ml}$  of SFN were stained with Trypan Blue and counted by microscopy. \*:501MEL and #: A375 indicate the statistical analysis verso untreated cells at the same time points (( $p < 0.05$  (\*)  $p < 0.01$  (\*\*)).

(B) p-AKT positive cells were evaluated by FACS analysis at 24 h post treatment. Results are representative of three independent experiments  $\pm$  SD. The statistical analysis was performed by paired two-tailed Student's test.

**Table S1.** Up-regulated and down-regulated genes in A375 cells during cell growth in culture (without compound treatment).

| <b>Gene Name and Symbol</b>                                              | <b>Fold change</b> |
|--------------------------------------------------------------------------|--------------------|
| E74 Like ETS Transcription Factor 3 (ELF3)                               | 7,66               |
| Transmembrane Protein 74B (TMEM74B)                                      | 5,70               |
| Uroplakin 1A (UPK1A)                                                     | 5,46               |
| Carbonic Anhydrase 9 (CA9)                                               | 4,85               |
| Thioredoxin Interacting Protein (TXNIP)                                  | 4,52               |
| Prostate Cancer Associated Transcript 6 (Non-Protein Coding) (KDM5B-AS1) | 4,35               |
| UPK1A Antisense RNA 1 (UPK1A-AS1)                                        | 4,31               |
| N-Myc Downstream Regulated 1 (NDRG1)                                     | 4,26               |
| Thrombospondin-Type Laminin G Domain And EAR Repeats (TSPEAR)            | 4,05               |
| Neuritin 1 (NRN1)                                                        | 4,05               |
| MIR210 Host Gene (MIR210HG)                                              | 3,98               |
| Chromosome 4 Open Reading Frame 47 (C4orf47)                             | 3,64               |
| PTPRF Interacting Protein Alpha 4 (PPFIA4)                               | 3,61               |
| Zona Pellucida Glycoprotein 1 (ZP1)                                      | 3,48               |
| Ribosomal Modification Protein RimK-Like Family Member A (RIMKLA)        | 3,37               |
| Transmembrane Protein 45A (TMEM45A)                                      | 3,28               |
| Espin Pseudogene (ESPNP)                                                 | 3,28               |
| SH3 Domain Containing 21 (SH3D21)                                        | 3,19               |
| Aldolase, Fructose-Bisphosphate C (ALDOC)                                | 3,07               |
| Stanniocalcin 1 (STC1)                                                   | 3,07               |
| TSPEAR Antisense RNA 2 (C21orf90)                                        | 3,05               |
| Sperm Associated Antigen 4 (SPAG4)                                       | 2,98               |
| ArfGAP With Coiled-Coil, Ankyrin Repeat And PH Domains 1 (ACAP1)         | 2,82               |
| Enolase 2 (ENO2)                                                         | 2,75               |
| Rho Guanine Nucleotide Exchange Factor 37 (ARHGEF37)                     | 2,65               |
| Ephrin A3 (EFNA3)                                                        | 2,62               |
| BCL2/Adenovirus E1B 19kDa Interacting Protein 3 (BNIP3)                  | 2,57               |
| Protein Phosphatase 1 Regulatory Subunit 3B (PPP1R3B)                    | 2,57               |
| Basic Helix-Loop-Helix Family Member E40 (BHLHE40)                       | 2,56               |
| 6-Phosphofructo-2-Kinase/Fructose-2,6-Biphosphatase 4 (PFKFB4)           | 2,50               |
| Obscurin, Cytoskeletal Calmodulin And Titin-Interacting RhoGEF (OBSCN)   | 2,45               |
| Protein Tyrosine Phosphatase, Receptor Type B (PTPRB)                    | 2,43               |
| Endothelial PAS Domain Protein 1 (EPAS1)                                 | 2,33               |
| Myosin XVB (MYO15B)                                                      | 2,18               |
| Intercellular Adhesion Molecule 5 (ICAM5)                                | 2,17               |
| ORAI Calcium Release-Activated Calcium Modulator 3 (ORAI3)               | 2,16               |
| Potassium Channel Tetramerization Domain Containing 11 (KCTD11)          | 2,15               |
| AHNAK Nucleoprotein 2 (AHNAK2)                                           | 2,11               |
| MAX Interactor 1, Dimerization Protein (MXI1)                            | 2,07               |
| Nuclear Factor Of Activated T-Cells 4 (NFATC4)                           | 2,07               |
| Ankyrin Repeat Domain 37 (ANKRD37)                                       | 2,06               |
| Cyclin G2 (CCNG2)                                                        | 1,92               |
| Heparan Sulfate Proteoglycan 2 (HSPG2)                                   | 1,90               |

|                                                                        |       |
|------------------------------------------------------------------------|-------|
| Perilipin 2 (PLIN2)                                                    | 1,89  |
| Discs Large Homolog 4 (DLG4)                                           | 1,84  |
| Insulin Induced Gene 2 (INSIG2)                                        | 1,78  |
| Nuclear Paraspeckle Assembly Transcript 1 (Non-Protein Coding) (NEAT1) | 1,78  |
| Aldehyde Dehydrogenase 3 Family Member B1 (ALDH3B1)                    | 1,78  |
| Thrombospondin Type 1 Domain Containing 4 (THSD4)                      | 1,77  |
| Pyruvate Dehydrogenase Kinase 1 (PDK1)                                 | 1,75  |
| ATP Binding Cassette Subfamily C Member 3 (ABBC3)                      | 1,72  |
| Prolyl 4-Hydroxylase Subunit Alpha 1 (P4HA1)                           | 1,71  |
| Peptidylglycine Alpha-Amidating Monooxygenase (PAM)                    | 1,71  |
| Inositol 1,4,5-Trisphosphate Receptor Type 1 (ITPR1)                   | 1,70  |
| ATP Binding Cassette Subfamily A Member 2 (ABCA2)                      | 1,67  |
| Dedicator Of Cytokinesis 6 (DOCK6)                                     | 1,66  |
| Zinc Finger Protein 395 (ZNF395)                                       | 1,66  |
| Mannose Phosphate Isomerase (MPI)                                      | 1,65  |
| ABI Family Member 3 Binding Protein (ABI3BP)                           | 1,58  |
| BCL2/Adenovirus E1B 19kDa Interacting Protein 3-Like (BNIP3L)          | 1,58  |
| Phosphoglycerate Kinase 1 (PGK1)                                       | 1,57  |
| Branched Chain Keto Acid Dehydrogenase E1, Alpha Polypeptide (BCKDHA)  | 1,56  |
| Lysine Demethylase 3A (KDM3A)                                          | 1,53  |
| Oncostatin M Receptor (OSMR)                                           | 1,51  |
| Glucan (1,4-Alpha-), Branching Enzyme 1 (GBE1)                         | 1,50  |
| Family With Sequence Similarity 162 Member A (FAM162A)                 | 1,49  |
| Phosphofructokinase, Liver Type (PFKL)                                 | 1,49  |
| DNA Damage Inducible Transcript 4 (DDIT4)                              | 1,48  |
| Ankyrin Repeat And Zinc Finger Domain Containing 1 (ANKZF1)            | 1,45  |
| Chromosome 4 Open Reading Frame 3 (C4orf3)                             | 1,45  |
| Zinc Finger Protein 292 (ZNF292)                                       | 1,44  |
| Hexokinase 2 (HK2)                                                     | 1,42  |
| Agrin (AGRN)                                                           | 1,34  |
| Laminin Subunit Beta 1 (LAMB1)                                         | 1,33  |
| 5'-Nucleotidase Ecto (NT5E)                                            | 1,33  |
| EPS8 Like 2 (EPS8L2)                                                   | 1,18  |
| Heat Shock Protein 90kDa Alpha Family Class A Member 1 (HSP90AA1)      | -1,17 |
| Heterogeneous Nuclear Ribonucleoprotein A/B (HNRNPAB)                  | -1,17 |
| Cysteine And Histidine Rich Domain Containing 1 (CHORDC1)              | -1,22 |
| Alanyl-tRNA synthetase (AARS)                                          | -1,23 |
| Cell Division Cycle 25A (CDC25A)                                       | -1,26 |
| Tyrosyl-TRNA Synthetase (YARS)                                         | -1,28 |
| H2A Histone Family Member Z (H2AFZ)                                    | -1,28 |
| Ribonucleotide Reductase Regulatory Subunit M2 (RRM2)                  | -1,30 |
| Cytochrome C, Somatic (CYCS)                                           | -1,32 |
| WD Repeat Domain 77 (WDR77)                                            | -1,32 |
| Flap Structure-Specific Endonuclease 1 (FEN1)                          | -1,33 |
| Cell Division Cycle 6 (CDC6)                                           | -1,34 |
| Acireductone Dioxygenase 1 (ADI1)                                      | -1,35 |
| Torsin Family 3 Member A (TOR3A)                                       | -1,36 |

|                                                                     |       |
|---------------------------------------------------------------------|-------|
| Solute Carrier Family 7 Member 11 (SLC7A11)                         | -1,38 |
| MYB Proto-Oncogene Like 2 (MYBL2)                                   | -1,40 |
| Cyclin E2 (CCNE2)                                                   | -1,40 |
| Geminin, DNA Replication Inhibitor (GMNN)                           | -1,41 |
| Minichromosome Maintenance 10 Replication Initiation Factor (MCM10) | -1,46 |
| Cyclin D3 (CCND3)                                                   | -1,46 |
| Heat Shock Protein Family A (Hsp70) Member 8 (HSPA8)                | -1,48 |
| DNA Replication And Sister Chromatid Cohesion 1 (DSCC1)             | -1,51 |
| DnaJ Heat Shock Protein Family (Hsp40) Member A1 (DNAJA1)           | -1,54 |
| Phosphoserine Phosphatase (PSPH)                                    | -1,54 |
| Proliferating Cell Nuclear Antigen (PCNA)                           | -1,57 |
| Methionyl-TRNA Synthetase (MARS)                                    | -1,60 |
| Claspin (CLSPN)                                                     | -1,63 |
| Heat Shock Protein Family H (Hsp110) Member 1 (HSPH1)               | -1,66 |
| MPV17 Mitochondrial Inner Membrane Protein Like 2 (MPV17L2)         | -1,68 |
| Transferrin Receptor (TFRC)                                         | -1,75 |
| Tryptophanyl-TRNA Synthetase (WARS)                                 | -1,87 |
| Heat Shock Protein Family A (Hsp70) Member 1A (HSPA1A)              | -1,96 |
| Solute Carrier Family 6 Member 9 (SLC6A9)                           | -2,10 |
| Heat Shock Protein Family A (Hsp70) Member 1B (HSPA1B)              | -2,15 |

---

**Table S2.** The results for each enriched GO category are listed in this table.

| Ensembl Gene Stable ID                                      | Gene symbol               | Description                                                                  | Entrez ID |
|-------------------------------------------------------------|---------------------------|------------------------------------------------------------------------------|-----------|
| <b>Biological process</b>                                   | <b>Response to stress</b> | <b>GO:0006950</b>                                                            |           |
| C=2825; O=86; E=38.03; R=2.26; rawP=1.50e-15; adjP=2.43e-12 |                           |                                                                              |           |
| ENSG00000095752                                             | IL11                      | interleukin 11                                                               | 3589      |
| ENSG00000162616                                             | DNAJB4                    | DnaJ (Hsp40) homolog, subfamily B, member 4                                  | 11080     |
| ENSG00000091592                                             | NLRP1                     | NLR family, pyrin domain containing 1                                        | 22861     |
| ENSG00000134986                                             | NREP                      | neuronal regeneration related protein homolog (rat)                          | 9315      |
| ENSG00000124762                                             | CDKN1A                    | cyclin-dependent kinase inhibitor 1A (p21, Cip1)                             | 1026      |
| ENSG00000100292                                             | HMOX1                     | heme oxygenase (decycling) 1                                                 | 3162      |
| ENSG00000104368                                             | PLAT                      | plasminogen activator, tissue                                                | 5327      |
| ENSG00000112319                                             | EYA4                      | eyes absent homolog 4 (Drosophila)                                           | 2070      |
| ENSG00000135679                                             | MDM2                      | Mdm2, p53 E3 ubiquitin protein ligase homolog (mouse)                        | 4193      |
| ENSG00000070669                                             | ASNS                      | asparagine synthetase (glutamine-hydrolyzing)                                | 440       |
| ENSG00000105993                                             | DNAJB6                    | DnaJ (Hsp40) homolog, subfamily B, member 6                                  | 10049     |
| ENSG00000128016                                             | ZFP36                     | zinc finger protein 36, C3H type, homolog (mouse)                            | 7538      |
| ENSG00000181104                                             | F2R                       | coagulation factor II (thrombin) receptor                                    | 2149      |
| ENSG00000239713                                             | APOBEC3G                  | apolipoprotein B mRNA editing enzyme, catalytic polypeptide-like 3G          | 60489     |
| ENSG00000116761                                             | CTH                       | cystathionase (cystathionine gamma-lyase)                                    | 1491      |
| ENSG00000173846                                             | PLK3                      | polo-like kinase 3                                                           | 1263      |
| ENSG00000196352                                             | CD55                      | CD55 molecule, decay accelerating factor for complement (Cromer blood group) | 1604      |
| ENSG00000142168                                             | SOD1                      | superoxide dismutase 1, soluble                                              | 6647      |
| ENSG00000185088                                             | RPS27L                    | ribosomal protein S27-like                                                   | 51065     |
| ENSG00000132170                                             | PPARG                     | peroxisome proliferator-activated receptor gamma                             | 5468      |
| ENSG00000159388                                             | BTG2                      | BTG family, member 2                                                         | 7832      |
| ENSG00000110172                                             | CHORDC1                   | cysteine and histidine-rich domain (CHORD) containing 1                      | 26973     |
| ENSG00000197903                                             | HIST1H2BK                 | histone cluster 1, H2bk                                                      | 85236     |
| ENSG00000162772                                             | ATF3                      | activating transcription factor 3                                            | 467       |
| ENSG00000086061                                             | DNAJA1                    | DnaJ (Hsp40) homolog, subfamily A, member 1                                  | 3301      |
| ENSG00000138413                                             | IDH1                      | isocitrate dehydrogenase 1 (NADP+), soluble                                  | 3417      |
| ENSG00000080546                                             | SESN1                     | sestrin 1                                                                    | 27244     |
| ENSG00000173110                                             | HSPA6                     | heat shock 70kDa protein 6 (HSP70B')                                         | 3310      |
| ENSG00000160255                                             | ITGB2                     | integrin, beta 2 (complement component 3 receptor 3 and 4 subunit)           | 3689      |
| ENSG00000119630                                             | PGF                       | placental growth factor                                                      | 5228      |
| ENSG00000204390                                             | HSPA1L                    | heat shock 70kDa protein 1-like                                              | 3305      |
| ENSG00000186480                                             | INSIG1                    | insulin induced gene 1                                                       | 3638      |
| ENSG00000160211                                             | G6PD                      | glucose-6-phosphate dehydrogenase                                            | 2539      |
| ENSG00000115919                                             | KYNU                      | kynureninase                                                                 | 8942      |
| ENSG00000099860                                             | GADD45B                   | growth arrest and DNA-damage-inducible, beta                                 | 4616      |
| ENSG00000152137                                             | HSPB8                     | heat shock 22kDa protein 8                                                   | 26353     |

|                 |          |                                                                                                      |        |
|-----------------|----------|------------------------------------------------------------------------------------------------------|--------|
| ENSG00000105327 | BBC3     | BCL2 binding component 3                                                                             | 27113  |
| ENSG00000120885 | CLU      | clusterin                                                                                            | 1191   |
| ENSG00000120694 | HSPH1    | heat shock 105kDa/110kDa protein 1                                                                   | 10808  |
| ENSG00000156273 | BACH1    | BTB and CNC homology 1, basic leucine zipper transcription factor 1                                  | 571    |
| ENSG00000023909 | GCLM     | glutamate-cysteine ligase, modifier subunit                                                          | 2730   |
| ENSG00000116299 | KIAA1324 | KIAA1324                                                                                             | 57535  |
| ENSG00000131080 | EDA2R    | ectodysplasin A2 receptor                                                                            | 60401  |
| ENSG00000120738 | EGR1     | early growth response 1                                                                              | 1958   |
| ENSG00000074590 | NUAK1    | NUAK family, SNF1-like kinase, 1                                                                     | 9891   |
| ENSG00000164938 | TP53INP1 | tumor protein p53 inducible nuclear protein 1                                                        | 94241  |
| ENSG00000160200 | CBS      | cystathionine-beta-synthase                                                                          | 875    |
| ENSG00000132002 | DNAJB1   | DnaJ (Hsp40) homolog, subfamily B, member 1                                                          | 3337   |
| ENSG00000048052 | HDAC9    | histone deacetylase 9                                                                                | 9734   |
| ENSG00000168209 | DDIT4    | DNA-damage-inducible transcript 4                                                                    | 54541  |
| ENSG00000085276 | MECOM    | MDS1 and EVI1 complex locus                                                                          | 2122   |
| ENSG00000161011 | SQSTM1   | sequestosome 1                                                                                       | 8878   |
| ENSG00000136560 | TANK     | TRAF family member-associated NFKB activator                                                         | 10010  |
| ENSG00000170855 | TRIAP1   | TP53 regulated inhibitor of apoptosis 1                                                              | 51499  |
| ENSG00000087088 | BAX      | BCL2-associated X protein                                                                            | 581    |
| ENSG00000010278 | CD9      | CD9 molecule                                                                                         | 928    |
| ENSG00000072310 | SREBF1   | sterol regulatory element binding transcription factor 1                                             | 6720   |
| ENSG00000080824 | HSP90AA1 | heat shock protein 90kDa alpha (cytosolic), class A member 1                                         | 3320   |
| ENSG00000116285 | ERRFI1   | ERBB receptor feedback inhibitor 1                                                                   | 54206  |
| ENSG00000184995 | IFNE     | interferon, epsilon                                                                                  | 338376 |
| ENSG00000198431 | TXNRD1   | thioredoxin reductase 1                                                                              | 7296   |
| ENSG00000134574 | DDB2     | damage-specific DNA binding protein 2, 48kDa                                                         | 1643   |
| ENSG00000001084 | GCLC     | glutamate-cysteine ligase, catalytic subunit                                                         | 2729   |
| ENSG00000181222 | POLR2A   | polymerase (RNA) II (DNA directed) polypeptide A, 220kDa                                             | 5430   |
| ENSG00000179583 | CIITA    | class II, major histocompatibility complex, transactivator                                           | 4261   |
| ENSG00000204388 | HSPA1B   | heat shock 70kDa protein 1B                                                                          | 3304   |
| ENSG00000026103 | FAS      | Fas (TNF receptor superfamily, member 6)                                                             | 355    |
| ENSG00000135047 | CTSL1    | cathepsin L1                                                                                         | 1514   |
| ENSG00000121691 | CAT      | catalase                                                                                             | 847    |
| ENSG00000117318 | ID3      | inhibitor of DNA binding 3, dominant negative helix-loop-helix protein                               | 3399   |
| ENSG00000065911 | MTHFD2   | methylenetetrahydrofolate dehydrogenase (NADP+ dependent) 2, methenyltetrahydrofolate cyclohydrolase | 10797  |
| ENSG00000116717 | GADD45A  | growth arrest and DNA-damage-inducible, alpha                                                        | 1647   |
| ENSG00000087074 | PPP1R15A | protein phosphatase 1, regulatory subunit 15A                                                        | 23645  |
| ENSG00000153879 | CEBPG    | CCAAT/enhancer binding protein (C/EBP), gamma                                                        | 1054   |
| ENSG00000181026 | AEN      | apoptosis enhancing nuclease                                                                         | 64782  |
| ENSG00000255150 | EID3     | EP300 interacting inhibitor of differentiation 3                                                     | 493861 |
| ENSG00000132470 | ITGB4    | integrin, beta 4                                                                                     | 3691   |
| ENSG00000174307 | PHLDA3   | pleckstrin homology-like domain, family A, member 3                                                  | 23612  |
| ENSG00000105939 | ZC3HAV1  | zinc finger CCCH-type, antiviral 1                                                                   | 56829  |

| Biological process                                     | Apoptotic process | GO:0006915                                                             |        |
|--------------------------------------------------------|-------------------|------------------------------------------------------------------------|--------|
| C=1470;O=57;E=19.79;R=2.88;rawP=4.88e-14;adjP=3.44e-11 |                   |                                                                        |        |
| ENSG00000023909                                        | GCLM              | glutamate-cysteine ligase, modifier subunit                            | 2730   |
| ENSG00000116299                                        | KIAA1324          | KIAA1324                                                               | 57535  |
| ENSG00000091592                                        | NLRP1             | NLR family, pyrin domain containing 1                                  | 22861  |
| ENSG00000164938                                        | TP53INP1          | tumor protein p53 inducible nuclear protein 1                          | 94241  |
| ENSG00000146072                                        | TNFRSF21          | tumor necrosis factor receptor superfamily, member 21                  | 27242  |
| ENSG00000124762                                        | CDKN1A            | cyclin-dependent kinase inhibitor 1A (p21, Cip1)                       | 1026   |
| ENSG00000100292                                        | HMOX1             | heme oxygenase (decycling) 1                                           | 3162   |
| ENSG00000139289                                        | PHLDA1            | pleckstrin homology-like domain, family A, member 1                    | 22822  |
| ENSG00000125657                                        | TNFSF9            | tumor necrosis factor (ligand) superfamily, member 9                   | 8744   |
| ENSG00000100625                                        | SIX4              | SIX homeobox 4                                                         | 51804  |
| ENSG00000196072                                        | BLOC1S2           | biogenesis of lysosomal organelles complex-1, subunit 2                | 282991 |
| ENSG00000085276                                        | MECOM             | MDS1 and EVI1 complex locus                                            | 2122   |
| ENSG00000168209                                        | DDIT4             | DNA-damage-inducible transcript 4                                      | 54541  |
| ENSG00000198121                                        | LPAR1             | lysophosphatidic acid receptor 1                                       | 1902   |
| ENSG00000151929                                        | BAG3              | BCL2-associated athanogene 3                                           | 9531   |
| ENSG00000135679                                        | MDM2              | Mdm2, p53 E3 ubiquitin protein ligase homolog (mouse)                  | 4193   |
| ENSG00000070669                                        | ASNS              | asparagine synthetase (glutamine-hydrolyzing)                          | 440    |
| ENSG00000161011                                        | SQSTM1            | sequestosome 1                                                         | 8878   |
| ENSG00000105993                                        | DNAJB6            | DnaJ (Hsp40) homolog, subfamily B, member 6                            | 10049  |
| ENSG00000170855                                        | TRIAP1            | TP53 regulated inhibitor of apoptosis 1                                | 51499  |
| ENSG00000162892                                        | IL24              | interleukin 24                                                         | 11009  |
| ENSG00000184254                                        | ALDH1A3           | aldehyde dehydrogenase 1 family, member A3                             | 220    |
| ENSG00000087088                                        | BAX               | BCL2-associated X protein                                              | 581    |
| ENSG00000006327                                        | TNFRSF12A         | tumor necrosis factor receptor superfamily, member 12A                 | 51330  |
| ENSG00000181104                                        | F2R               | coagulation factor II (thrombin) receptor                              | 2149   |
| ENSG00000240694                                        | PNMA2             | paraneoplastic Ma antigen 2                                            | 10687  |
| ENSG00000146674                                        | IGFBP3            | insulin-like growth factor binding protein 3                           | 3486   |
| ENSG00000108179                                        | PPIF              | peptidylprolyl isomerase F                                             | 10105  |
| ENSG00000173846                                        | PLK3              | polo-like kinase 3                                                     | 1263   |
| ENSG00000162734                                        | PEA15             | phosphoprotein enriched in astrocytes 15                               | 8682   |
| ENSG00000142168                                        | SOD1              | superoxide dismutase 1, soluble                                        | 6647   |
| ENSG00000185088                                        | RPS27L            | ribosomal protein S27-like                                             | 51065  |
| ENSG00000132170                                        | PPARG             | peroxisome proliferator-activated receptor gamma                       | 5468   |
| ENSG00000001084                                        | GCLC              | glutamate-cysteine ligase, catalytic subunit                           | 2729   |
| ENSG00000159388                                        | BTG2              | BTG family, member 2                                                   | 7832   |
| ENSG00000115641                                        | FHL2              | four and a half LIM domains 2                                          | 2274   |
| ENSG00000204388                                        | HSPA1B            | heat shock 70kDa protein 1B                                            | 3304   |
| ENSG00000026103                                        | FAS               | Fas (TNF receptor superfamily, member 6)                               | 355    |
| ENSG00000135047                                        | CTSL1             | cathepsin L1                                                           | 1514   |
| ENSG00000160255                                        | ITGB2             | integrin, beta 2 (complement component 3 receptor 3 and 4 subunit)     | 3689   |
| ENSG00000121691                                        | CAT               | catalase                                                               | 847    |
| ENSG00000117318                                        | ID3               | inhibitor of DNA binding 3, dominant negative helix-loop-helix protein | 3399   |

|                                                        |              |                                                         |        |
|--------------------------------------------------------|--------------|---------------------------------------------------------|--------|
| ENSG00000116717                                        | GADD45A      | growth arrest and DNA-damage-inducible, alpha           | 1647   |
| ENSG00000142627                                        | EPHA2        | EPH receptor A2                                         | 1969   |
| ENSG00000087074                                        | PPP1R15A     | protein phosphatase 1, regulatory subunit 15A           | 23645  |
| ENSG00000099860                                        | GADD45B      | growth arrest and DNA-damage-inducible, beta            | 4616   |
| ENSG00000181026                                        | AEN          | apoptosis enhancing nuclease                            | 64782  |
| ENSG00000105327                                        | BBC3         | BCL2 binding component 3                                | 27113  |
| ENSG00000120885                                        | CLU          | clusterin                                               | 1191   |
| ENSG00000174307                                        | PHLDA3       | pleckstrin homology-like domain, family A, member 3     | 23612  |
| ENSG00000160570                                        | DEDD2        | death effector domain containing 2                      | 162989 |
| ENSG00000136002                                        | ARHGEF4      | Rho guanine nucleotide exchange factor (GEF) 4          | 50649  |
| <b>Biological process</b>                              | <b>Death</b> | <b>GO:0016265</b>                                       |        |
| C=1639;O=60;E=22.06;R=2.72;rawP=1.06e-13;adjP=3.44e-11 |              |                                                         |        |
| ENSG00000023909                                        | GCLM         | glutamate-cysteine ligase, modifier subunit             | 2730   |
| ENSG00000116299                                        | KIAA1324     | KIAA1324                                                | 57535  |
| ENSG00000091592                                        | NLRP1        | NLR family, pyrin domain containing 1                   | 22861  |
| ENSG00000164938                                        | TP53INP1     | tumor protein p53 inducible nuclear protein 1           | 94241  |
| ENSG00000146072                                        | TNFRSF21     | tumor necrosis factor receptor superfamily, member 21   | 27242  |
| ENSG00000124762                                        | CDKN1A       | cyclin-dependent kinase inhibitor 1A (p21, Cip1)        | 1026   |
| ENSG00000128965                                        | CHAC1        | ChaC, cation transport regulator homolog 1 (E. coli)    | 79094  |
| ENSG00000100292                                        | HMOX1        | heme oxygenase (decycling) 1                            | 3162   |
| ENSG00000139289                                        | PHLDA1       | pleckstrin homology-like domain, family A, member 1     | 22822  |
| ENSG00000125657                                        | TNFSF9       | tumor necrosis factor (ligand) superfamily, member 9    | 8744   |
| ENSG00000100625                                        | SIX4         | SIX homeobox 4                                          | 51804  |
| ENSG00000196072                                        | BLOC1S2      | biogenesis of lysosomal organelles complex-1, subunit 2 | 282991 |
| ENSG00000085276                                        | MECOM        | MDS1 and EVI1 complex locus                             | 2122   |
| ENSG00000168209                                        | DDIT4        | DNA-damage-inducible transcript 4                       | 54541  |
| ENSG00000198121                                        | LPAR1        | lysophosphatidic acid receptor 1                        | 1902   |
| ENSG00000151929                                        | BAG3         | BCL2-associated athanogene 3                            | 9531   |
| ENSG00000135679                                        | MDM2         | Mdm2, p53 E3 ubiquitin protein ligase homolog (mouse)   | 4193   |
| ENSG00000070669                                        | ASNS         | asparagine synthetase (glutamine-hydrolyzing)           | 440    |
| ENSG00000161011                                        | SQSTM1       | sequestosome 1                                          | 8878   |
| ENSG00000105993                                        | DNAJB6       | DnaJ (Hsp40) homolog, subfamily B, member 6             | 10049  |
| ENSG00000170855                                        | TRIAP1       | TP53 regulated inhibitor of apoptosis 1                 | 51499  |
| ENSG00000162892                                        | IL24         | interleukin 24                                          | 11009  |
| ENSG00000184254                                        | ALDH1A3      | aldehyde dehydrogenase 1 family, member A3              | 220    |
| ENSG00000087088                                        | BAX          | BCL2-associated X protein                               | 581    |
| ENSG00000006327                                        | TNFRSF12A    | tumor necrosis factor receptor superfamily, member 12A  | 51330  |
| ENSG00000181104                                        | F2R          | coagulation factor II (thrombin) receptor               | 2149   |
| ENSG00000240694                                        | PNMA2        | paraneoplastic Ma antigen 2                             | 10687  |
| ENSG00000146674                                        | IGFBP3       | insulin-like growth factor binding protein 3            | 3486   |
| ENSG00000108179                                        | PPIF         | peptidylprolyl isomerase F                              | 10105  |
| ENSG00000173846                                        | PLK3         | polo-like kinase 3                                      | 1263   |
| ENSG00000162734                                        | PEA15        | phosphoprotein enriched in astrocytes 15                | 8682   |
| ENSG00000106105                                        | GARS         | glycyl-tRNA synthetase                                  | 2617   |
| ENSG00000142168                                        | SOD1         | superoxide dismutase 1, soluble                         | 6647   |
| ENSG00000185088                                        | RPS27L       | ribosomal protein S27-like                              | 51065  |



|                                                        |                              |                                                                        |        |
|--------------------------------------------------------|------------------------------|------------------------------------------------------------------------|--------|
| ENSG00000132170                                        | PPARG                        | peroxisome proliferator-activated receptor gamma                       | 5468   |
| ENSG00000001084                                        | GCLC                         | glutamate-cysteine ligase, catalytic subunit                           | 2729   |
| ENSG00000159388                                        | BTG2                         | BTG family, member 2                                                   | 7832   |
| ENSG00000115641                                        | FHL2                         | four and a half LIM domains 2                                          | 2274   |
| ENSG00000204388                                        | HSPA1B                       | heat shock 70kDa protein 1B                                            | 3304   |
| ENSG00000026103                                        | FAS                          | Fas (TNF receptor superfamily, member 6)                               | 355    |
| ENSG00000135047                                        | CTSL1                        | cathepsin L1                                                           | 1514   |
| ENSG00000160255                                        | ITGB2                        | integrin, beta 2 (complement component 3 receptor 3 and 4 subunit)     | 3689   |
| ENSG00000121691                                        | CAT                          | catalase                                                               | 847    |
| ENSG00000117318                                        | ID3                          | inhibitor of DNA binding 3, dominant negative helix-loop-helix protein | 3399   |
| ENSG00000116717                                        | GADD45A                      | growth arrest and DNA-damage-inducible, alpha                          | 1647   |
| ENSG00000142627                                        | EPHA2                        | EPH receptor A2                                                        | 1969   |
| ENSG00000087074                                        | PPP1R15A                     | protein phosphatase 1, regulatory subunit 15A                          | 23645  |
| ENSG00000099860                                        | GADD45B                      | growth arrest and DNA-damage-inducible, beta                           | 4616   |
| ENSG00000152137                                        | HSPB8                        | heat shock 22kDa protein 8                                             | 26353  |
| ENSG00000181026                                        | AEN                          | apoptosis enhancing nuclease                                           | 64782  |
| ENSG00000105327                                        | BBC3                         | BCL2 binding component 3                                               | 27113  |
| ENSG00000120885                                        | CLU                          | clusterin                                                              | 1191   |
| ENSG00000174307                                        | PHLDA3                       | pleckstrin homology-like domain, family A, member 3                    | 23612  |
| ENSG00000160570                                        | DEDD2                        | death effector domain containing 2                                     | 162989 |
| ENSG00000136002                                        | ARHGEF4                      | Rho guanine nucleotide exchange factor (GEF) 4                         | 50649  |
| <b>Biological process</b>                              | <b>Programmed cell death</b> | <b>GO:0012501</b>                                                      |        |
| C=1485;O=57;E=19.99;R=2.85;rawP=7.55e-14;adjP=3.44e-11 |                              |                                                                        |        |
| ENSG00000023909                                        | GCLM                         | glutamate-cysteine ligase, modifier subunit                            | 2730   |
| ENSG00000116299                                        | KIAA1324                     | KIAA1324                                                               | 57535  |
| ENSG00000091592                                        | NLRP1                        | NLR family, pyrin domain containing 1                                  | 22861  |
| ENSG00000164938                                        | TP53INP1                     | tumor protein p53 inducible nuclear protein 1                          | 94241  |
| ENSG00000146072                                        | TNFRSF21                     | tumor necrosis factor receptor superfamily, member 21                  | 27242  |
| ENSG00000124762                                        | CDKN1A                       | cyclin-dependent kinase inhibitor 1A (p21, Cip1)                       | 1026   |
| ENSG00000128965                                        | CHAC1                        | ChaC, cation transport regulator homolog 1 (E. coli)                   | 79094  |
| ENSG00000100292                                        | HMOX1                        | heme oxygenase (decycling) 1                                           | 3162   |
| ENSG00000139289                                        | PHLDA1                       | pleckstrin homology-like domain, family A, member 1                    | 22822  |
| ENSG00000125657                                        | TNFSF9                       | tumor necrosis factor (ligand) superfamily, member 9                   | 8744   |
| ENSG00000100625                                        | SIX4                         | SIX homeobox 4                                                         | 51804  |
| ENSG00000196072                                        | BLOC1S2                      | biogenesis of lysosomal organelles complex-1, subunit 2                | 282991 |
| ENSG00000085276                                        | MECOM                        | MDS1 and EVI1 complex locus                                            | 2122   |
| ENSG00000168209                                        | DDIT4                        | DNA-damage-inducible transcript 4                                      | 54541  |
| ENSG00000198121                                        | LPAR1                        | lysophosphatidic acid receptor 1                                       | 1902   |
| ENSG00000151929                                        | BAG3                         | BCL2-associated athanogene 3                                           | 9531   |
| ENSG00000135679                                        | MDM2                         | Mdm2, p53 E3 ubiquitin protein ligase homolog (mouse)                  | 4193   |
| ENSG00000070669                                        | ASNS                         | asparagine synthetase (glutamine-hydrolyzing)                          | 440    |
| ENSG00000161011                                        | SQSTM1                       | sequestosome 1                                                         | 8878   |
| ENSG00000105993                                        | DNAJB6                       | DnaJ (Hsp40) homolog, subfamily B, member 6                            | 10049  |
| ENSG00000170855                                        | TRIAP1                       | TP53 regulated inhibitor of apoptosis 1                                | 51499  |

|                                                        |                   |                                                                        |        |
|--------------------------------------------------------|-------------------|------------------------------------------------------------------------|--------|
| ENSG00000162892                                        | IL24              | interleukin 24                                                         | 11009  |
| ENSG00000184254                                        | ALDH1A3           | aldehyde dehydrogenase 1 family, member A3                             | 220    |
| ENSG00000087088                                        | BAX               | BCL2-associated X protein                                              | 581    |
| ENSG00000006327                                        | TNFRSF12A         | tumor necrosis factor receptor superfamily, member 12A                 | 51330  |
| ENSG00000181104                                        | F2R               | coagulation factor II (thrombin) receptor                              | 2149   |
| ENSG00000240694                                        | PNMA2             | paraneoplastic Ma antigen 2                                            | 10687  |
| ENSG00000146674                                        | IGFBP3            | insulin-like growth factor binding protein 3                           | 3486   |
| ENSG00000108179                                        | PPIF              | peptidylprolyl isomerase F                                             | 10105  |
| ENSG00000173846                                        | PLK3              | polo-like kinase 3                                                     | 1263   |
| ENSG00000162734                                        | PEA15             | phosphoprotein enriched in astrocytes 15                               | 8682   |
| ENSG00000142168                                        | SOD1              | superoxide dismutase 1, soluble                                        | 6647   |
| ENSG00000185088                                        | RPS27L            | ribosomal protein S27-like                                             | 51065  |
| ENSG00000132170                                        | PPARG             | peroxisome proliferator-activated receptor gamma                       | 5468   |
| ENSG00000001084                                        | GCLC              | glutamate-cysteine ligase, catalytic subunit                           | 2729   |
| ENSG00000159388                                        | BTG2              | BTG family, member 2                                                   | 7832   |
| ENSG00000115641                                        | FHL2              | four and a half LIM domains 2                                          | 2274   |
| ENSG00000204388                                        | HSPA1B            | heat shock 70kDa protein 1B                                            | 3304   |
| ENSG00000026103                                        | FAS               | Fas (TNF receptor superfamily, member 6)                               | 355    |
| ENSG00000135047                                        | CTSL1             | cathepsin L1                                                           | 1514   |
| ENSG00000160255                                        | ITGB2             | integrin, beta 2 (complement component 3 receptor 3 and 4 subunit)     | 3689   |
| ENSG00000121691                                        | CAT               | catalase                                                               | 847    |
| ENSG00000117318                                        | ID3               | inhibitor of DNA binding 3, dominant negative helix-loop-helix protein | 3399   |
| ENSG00000116717                                        | GADD45A           | growth arrest and DNA-damage-inducible, alpha                          | 1647   |
| ENSG00000142627                                        | EPHA2             | EPH receptor A2                                                        | 1969   |
| ENSG00000087074                                        | PPP1R15A          | protein phosphatase 1, regulatory subunit 15A                          | 23645  |
| ENSG00000099860                                        | GADD45B           | growth arrest and DNA-damage-inducible, beta                           | 4616   |
| ENSG00000181026                                        | AEN               | apoptosis enhancing nuclease                                           | 64782  |
| ENSG00000105327                                        | BBC3              | BCL2 binding component 3                                               | 27113  |
| ENSG00000120885                                        | CLU               | clusterin                                                              | 1191   |
| ENSG00000174307                                        | PHLDA3            | pleckstrin homology-like domain, family A, member 3                    | 23612  |
| ENSG00000160570                                        | DEDD2             | death effector domain containing 2                                     | 162989 |
| ENSG00000136002                                        | ARHGEF4           | Rho guanine nucleotide exchange factor (GEF) 4                         | 50649  |
| <b>Biological process</b>                              | <b>Cell death</b> | <b>GO:0008219</b>                                                      |        |
| C=1637;O=60;E=22.04;R=2.72;rawP=1.00e-13;adjP=3.44e-11 |                   |                                                                        |        |
| ENSG00000023909                                        | GCLM              | glutamate-cysteine ligase, modifier subunit                            | 2730   |
| ENSG00000116299                                        | KIAA1324          | KIAA1324                                                               | 57535  |
| ENSG00000091592                                        | NLRP1             | NLR family, pyrin domain containing 1                                  | 22861  |
| ENSG00000164938                                        | TP53INP1          | tumor protein p53 inducible nuclear protein 1                          | 94241  |
| ENSG00000146072                                        | TNFRSF21          | tumor necrosis factor receptor superfamily, member 21                  | 27242  |
| ENSG00000124762                                        | CDKN1A            | cyclin-dependent kinase inhibitor 1A (p21, Cip1)                       | 1026   |
| ENSG00000100292                                        | HMOX1             | heme oxygenase (decycling) 1                                           | 3162   |
| ENSG00000139289                                        | PHLDA1            | pleckstrin homology-like domain, family A, member 1                    | 22822  |
| ENSG00000125657                                        | TNFSF9            | tumor necrosis factor (ligand) superfamily, member 9                   | 8744   |
| ENSG00000100625                                        | SIX4              | SIX homeobox 4                                                         | 51804  |

|                 |           |                                                                        |        |
|-----------------|-----------|------------------------------------------------------------------------|--------|
| ENSG00000196072 | BLOC1S2   | biogenesis of lysosomal organelles complex-1, subunit 2                | 282991 |
| ENSG00000085276 | MECOM     | MDS1 and EVI1 complex locus                                            | 2122   |
| ENSG00000168209 | DDIT4     | DNA-damage-inducible transcript 4                                      | 54541  |
| ENSG00000198121 | LPAR1     | lysophosphatidic acid receptor 1                                       | 1902   |
| ENSG00000151929 | BAG3      | BCL2-associated athanogene 3                                           | 9531   |
| ENSG00000135679 | MDM2      | Mdm2, p53 E3 ubiquitin protein ligase homolog (mouse)                  | 4193   |
| ENSG00000070669 | ASNS      | asparagine synthetase (glutamine-hydrolyzing)                          | 440    |
| ENSG00000161011 | SQSTM1    | sequestosome 1                                                         | 8878   |
| ENSG00000105993 | DNAJB6    | DnaJ (Hsp40) homolog, subfamily B, member 6                            | 10049  |
| ENSG00000170855 | TRIAP1    | TP53 regulated inhibitor of apoptosis 1                                | 51499  |
| ENSG00000162892 | IL24      | interleukin 24                                                         | 11009  |
| ENSG00000184254 | ALDH1A3   | aldehyde dehydrogenase 1 family, member A3                             | 220    |
| ENSG00000087088 | BAX       | BCL2-associated X protein                                              | 581    |
| ENSG00000006327 | TNFRSF12A | tumor necrosis factor receptor superfamily, member 12A                 | 51330  |
| ENSG00000181104 | F2R       | coagulation factor II (thrombin) receptor                              | 2149   |
| ENSG00000240694 | PNMA2     | paraneoplastic Ma antigen 2                                            | 10687  |
| ENSG00000146674 | IGFBP3    | insulin-like growth factor binding protein 3                           | 3486   |
| ENSG00000108179 | PPIF      | peptidylprolyl isomerase F                                             | 10105  |
| ENSG00000173846 | PLK3      | polo-like kinase 3                                                     | 1263   |
| ENSG00000162734 | PEA15     | phosphoprotein enriched in astrocytes 15                               | 8682   |
| ENSG00000106105 | GARS      | glycyl-tRNA synthetase                                                 | 2617   |
| ENSG00000142168 | SOD1      | superoxide dismutase 1, soluble                                        | 6647   |
| ENSG00000185088 | RPS27L    | ribosomal protein S27-like                                             | 51065  |
| ENSG00000132170 | PPARG     | peroxisome proliferator-activated receptor gamma                       | 5468   |
| ENSG00000001084 | GCLC      | glutamate-cysteine ligase, catalytic subunit                           | 2729   |
| ENSG00000159388 | BTG2      | BTG family, member 2                                                   | 7832   |
| ENSG00000115641 | FHL2      | four and a half LIM domains 2                                          | 2274   |
| ENSG00000204388 | HSPA1B    | heat shock 70kDa protein 1B                                            | 3304   |
| ENSG00000026103 | FAS       | Fas (TNF receptor superfamily, member 6)                               | 355    |
| ENSG00000135047 | CTSL1     | cathepsin L1                                                           | 1514   |
| ENSG00000160255 | ITGB2     | integrin, beta 2 (complement component 3 receptor 3 and 4 subunit)     | 3689   |
| ENSG00000121691 | CAT       | catalase                                                               | 847    |
| ENSG00000117318 | ID3       | inhibitor of DNA binding 3, dominant negative helix-loop-helix protein | 3399   |
| ENSG00000116717 | GADD45A   | growth arrest and DNA-damage-inducible, alpha                          | 1647   |
| ENSG00000142627 | EPHA2     | EPH receptor A2                                                        | 1969   |
| ENSG00000087074 | PPP1R15A  | protein phosphatase 1, regulatory subunit 15A                          | 23645  |
| ENSG00000099860 | GADD45B   | growth arrest and DNA-damage-inducible, beta                           | 4616   |
| ENSG00000152137 | HSPB8     | heat shock 22kDa protein 8                                             | 26353  |
| ENSG00000181026 | AEN       | apoptosis enhancing nuclease                                           | 64782  |
| ENSG00000105327 | BBC3      | BCL2 binding component 3                                               | 27113  |
| ENSG00000120885 | CLU       | clusterin                                                              | 1191   |
| ENSG00000174307 | PHLDA3    | pleckstrin homology-like domain, family A, member 3                    | 23612  |
| ENSG00000160570 | DEDD2     | death effector domain containing 2                                     | 162989 |
| ENSG00000136002 | ARHGEF4   | Rho guanine nucleotide exchange factor (GEF) 4                         | 50649  |

| <b>Biological process</b>                               | <b>Response to topologically incorrect protein</b> | <b>GO:0035966</b>                                                            |        |
|---------------------------------------------------------|----------------------------------------------------|------------------------------------------------------------------------------|--------|
| C=136;O=16;E=1.83;R=8.74;rawP=3.87e-11;adjP=9.47e-09    |                                                    |                                                                              |        |
| ENSG00000120694                                         | HSPH1                                              | heat shock 105kDa/110kDa protein 1                                           | 10808  |
| ENSG00000162616                                         | DNAJB4                                             | DnaJ (Hsp40) homolog, subfamily B, member 4                                  | 11080  |
| ENSG00000162772                                         | ATF3                                               | activating transcription factor 3                                            | 467    |
| ENSG00000086061                                         | DNAJA1                                             | DnaJ (Hsp40) homolog, subfamily A, member 1                                  | 3301   |
| ENSG00000132002                                         | DNAJB1                                             | DnaJ (Hsp40) homolog, subfamily B, member 1                                  | 3337   |
| ENSG00000204388                                         | HSPA1B                                             | heat shock 70kDa protein 1B                                                  | 3304   |
| ENSG00000173110                                         | HSPA6                                              | heat shock 70kDa protein 6 (HSP70B')                                         | 3310   |
| ENSG00000204390                                         | HSPA1L                                             | heat shock 70kDa protein 1-like                                              | 3305   |
| ENSG00000070669                                         | ASNS                                               | asparagine synthetase (glutamine-hydrolyzing)                                | 440    |
| ENSG00000087074                                         | PPP1R15A                                           | protein phosphatase 1, regulatory subunit 15A                                | 23645  |
| ENSG00000105993                                         | DNAJB6                                             | DnaJ (Hsp40) homolog, subfamily B, member 6                                  | 10049  |
| ENSG00000087088                                         | BAX                                                | BCL2-associated X protein                                                    | 581    |
| ENSG00000120885                                         | CLU                                                | clusterin                                                                    | 1191   |
| ENSG00000080824                                         | HSP90AA1                                           | heat shock protein 90kDa alpha (cytosolic), class A member 1                 | 3320   |
| ENSG00000116761                                         | CTH                                                | cystathionase (cystathionine gamma-lyase)                                    | 1491   |
| <b>Biological process</b>                               | <b>Response to stimulus</b>                        | <b>GO:0050896</b>                                                            |        |
| C=6326;O=129;E=85.16;R=1.51;rawP=4.09e-11;adjP=9.47e-09 |                                                    |                                                                              |        |
| ENSG00000162616                                         | DNAJB4                                             | DnaJ (Hsp40) homolog, subfamily B, member 4                                  | 11080  |
| ENSG00000221926                                         | TRIM16                                             | tripartite motif containing 16                                               | 10626  |
| ENSG00000091592                                         | NLRP1                                              | NLR family, pyrin domain containing 1                                        | 22861  |
| ENSG00000146072                                         | TNFRSF21                                           | tumor necrosis factor receptor superfamily, member 21                        | 27242  |
| ENSG00000109814                                         | UGDH                                               | UDP-glucose 6-dehydrogenase                                                  | 7358   |
| ENSG00000134986                                         | NREP                                               | neuronal regeneration related protein homolog (rat)                          | 9315   |
| ENSG00000124762                                         | CDKN1A                                             | cyclin-dependent kinase inhibitor 1A (p21, Cip1)                             | 1026   |
| ENSG00000104368                                         | PLAT                                               | plasminogen activator, tissue                                                | 5327   |
| ENSG00000171517                                         | LPAR3                                              | lysophosphatidic acid receptor 3                                             | 23566  |
| ENSG00000112319                                         | EYA4                                               | eyes absent homolog 4 (Drosophila)                                           | 2070   |
| ENSG00000099994                                         | SUSD2                                              | sushi domain containing 2                                                    | 56241  |
| ENSG00000198121                                         | LPAR1                                              | lysophosphatidic acid receptor 1                                             | 1902   |
| ENSG00000128016                                         | ZFP36                                              | zinc finger protein 36, C3H type, homolog (mouse)                            | 7538   |
| ENSG00000184254                                         | ALDH1A3                                            | aldehyde dehydrogenase 1 family, member A3                                   | 220    |
| ENSG00000179046                                         | TRIML2                                             | tripartite motif family-like 2                                               | 205860 |
| ENSG00000239713                                         | APOBEC3G                                           | apolipoprotein B mRNA editing enzyme, catalytic polypeptide-like 3G          | 60489  |
| ENSG00000173846                                         | PLK3                                               | polo-like kinase 3                                                           | 1263   |
| ENSG00000196352                                         | CD55                                               | CD55 molecule, decay accelerating factor for complement (Cromer blood group) | 1604   |
| ENSG00000142168                                         | SOD1                                               | superoxide dismutase 1, soluble                                              | 6647   |
| ENSG00000185088                                         | RPS27L                                             | ribosomal protein S27-like                                                   | 51065  |
| ENSG00000132170                                         | PPARG                                              | peroxisome proliferator-activated receptor gamma                             | 5468   |
| ENSG00000153292                                         | GPR110                                             | G protein-coupled receptor 110                                               | 266977 |

|                 |           |                                                                                                      |        |
|-----------------|-----------|------------------------------------------------------------------------------------------------------|--------|
| ENSG00000197903 | HIST1H2BK | histone cluster 1, H2bk                                                                              | 85236  |
| ENSG00000138413 | IDH1      | isocitrate dehydrogenase 1 (NADP+), soluble                                                          | 3417   |
| ENSG00000080546 | SESN1     | sestrin 1                                                                                            | 27244  |
| ENSG00000173110 | HSPA6     | heat shock 70kDa protein 6 (HSP70B')                                                                 | 3310   |
| ENSG00000160255 | ITGB2     | integrin, beta 2 (complement component 3 receptor 3 and 4 subunit)                                   | 3689   |
| ENSG00000119630 | PGF       | placental growth factor                                                                              | 5228   |
| ENSG00000204390 | HSPA1L    | heat shock 70kDa protein 1-like                                                                      | 3305   |
| ENSG00000142627 | EPHA2     | EPH receptor A2                                                                                      | 1969   |
| ENSG00000186480 | INSIG1    | insulin induced gene 1                                                                               | 3638   |
| ENSG00000115919 | KYNU      | kynureninase                                                                                         | 8942   |
| ENSG00000105327 | BBC3      | BCL2 binding component 3                                                                             | 27113  |
| ENSG00000075223 | SEMA3C    | sema domain, immunoglobulin domain (Ig), short basic domain, secreted, (semaphorin) 3C               | 10512  |
| ENSG00000120885 | CLU       | clusterin                                                                                            | 1191   |
| ENSG00000120694 | HSPH1     | heat shock 105kDa/110kDa protein 1                                                                   | 10808  |
| ENSG00000156273 | BACH1     | BTB and CNC homology 1, basic leucine zipper transcription factor 1                                  | 571    |
| ENSG00000120738 | EGR1      | early growth response 1                                                                              | 1958   |
| ENSG00000074590 | NUAK1     | NUAK family, SNF1-like kinase, 1                                                                     | 9891   |
| ENSG00000164938 | TP53INP1  | tumor protein p53 inducible nuclear protein 1                                                        | 94241  |
| ENSG00000102048 | ASB9      | ankyrin repeat and SOCS box containing 9                                                             | 140462 |
| ENSG00000132002 | DNAJB1    | DnaJ (Hsp40) homolog, subfamily B, member 1                                                          | 3337   |
| ENSG00000138166 | DUSP5     | dual specificity phosphatase 5                                                                       | 1847   |
| ENSG00000168209 | DDIT4     | DNA-damage-inducible transcript 4                                                                    | 54541  |
| ENSG00000085276 | MECOM     | MDS1 and EVI1 complex locus                                                                          | 2122   |
| ENSG00000161011 | SQSTM1    | sequestosome 1                                                                                       | 8878   |
| ENSG00000072310 | SREBF1    | sterol regulatory element binding transcription factor 1                                             | 6720   |
| ENSG00000006327 | TNFRSF12A | tumor necrosis factor receptor superfamily, member 12A                                               | 51330  |
| ENSG00000162734 | PEA15     | phosphoprotein enriched in astrocytes 15                                                             | 8682   |
| ENSG00000003137 | CYP26B1   | cytochrome P450, family 26, subfamily B, polypeptide 1                                               | 56603  |
| ENSG00000134574 | DDB2      | damage-specific DNA binding protein 2, 48kDa                                                         | 1643   |
| ENSG00000115641 | FHL2      | four and a half LIM domains 2                                                                        | 2274   |
| ENSG00000179583 | CIITA     | class II, major histocompatibility complex, transactivator                                           | 4261   |
| ENSG00000026103 | FAS       | Fas (TNF receptor superfamily, member 6)                                                             | 355    |
| ENSG00000095383 | TBC1D2    | TBC1 domain family, member 2                                                                         | 55357  |
| ENSG00000121691 | CAT       | catalase                                                                                             | 847    |
| ENSG00000065911 | MTHFD2    | methylenetetrahydrofolate dehydrogenase (NADP+ dependent) 2, methenyltetrahydrofolate cyclohydrolase | 10797  |
| ENSG00000087074 | PPP1R15A  | protein phosphatase 1, regulatory subunit 15A                                                        | 23645  |
| ENSG00000153879 | CEBPG     | CCAAT/enhancer binding protein (C/EBP), gamma                                                        | 1054   |
| ENSG00000255150 | EID3      | EP300 interacting inhibitor of differentiation 3                                                     | 493861 |
| ENSG00000101849 | TBL1X     | transducin (beta)-like 1X-linked                                                                     | 6907   |
| ENSG00000105939 | ZC3HAV1   | zinc finger CCCH-type, antiviral 1                                                                   | 56829  |
| ENSG00000095752 | IL11      | interleukin 11                                                                                       | 3589   |
| ENSG00000170485 | NPAS2     | neuronal PAS domain protein 2                                                                        | 4862   |
| ENSG00000162733 | DDR2      | discoidin domain receptor tyrosine kinase 2                                                          | 4921   |

|                 |          |                                                                          |        |
|-----------------|----------|--------------------------------------------------------------------------|--------|
| ENSG00000100292 | HMOX1    | heme oxygenase (decycling) 1                                             | 3162   |
| ENSG00000125657 | TNFSF9   | tumor necrosis factor (ligand) superfamily, member 9                     | 8744   |
| ENSG00000070669 | ASNS     | asparagine synthetase (glutamine-hydrolyzing)                            | 440    |
| ENSG00000135679 | MDM2     | Mdm2, p53 E3 ubiquitin protein ligase homolog (mouse)                    | 4193   |
| ENSG00000105993 | DNAJB6   | DnaJ (Hsp40) homolog, subfamily B, member 6                              | 10049  |
| ENSG00000181104 | F2R      | coagulation factor II (thrombin) receptor                                | 2149   |
| ENSG00000063660 | GPC1     | glypican 1                                                               | 2817   |
| ENSG00000146674 | IGFBP3   | insulin-like growth factor binding protein 3                             | 3486   |
| ENSG00000123975 | CKS2     | CDC28 protein kinase regulatory subunit 2                                | 1164   |
| ENSG00000116761 | CTH      | cystathionase (cystathionine gamma-lyase)                                | 1491   |
| ENSG00000159388 | BTG2     | BTG family, member 2                                                     | 7832   |
| ENSG00000110172 | CHORDC1  | cysteine and histidine-rich domain (CHORD) containing 1                  | 26973  |
| ENSG00000162772 | ATF3     | activating transcription factor 3                                        | 467    |
| ENSG00000086061 | DNAJA1   | DnaJ (Hsp40) homolog, subfamily A, member 1                              | 3301   |
| ENSG00000160211 | G6PD     | glucose-6-phosphate dehydrogenase                                        | 2539   |
| ENSG00000099860 | GADD45B  | growth arrest and DNA-damage-inducible, beta                             | 4616   |
| ENSG00000152137 | HSPB8    | heat shock 22kDa protein 8                                               | 26353  |
| ENSG00000106070 | GRB10    | growth factor receptor-bound protein 10                                  | 2887   |
| ENSG00000134363 | FST      | follicle-stimulating hormone receptor-like 1                             | 10468  |
| ENSG00000170689 | HOXB9    | homeobox B9                                                              | 3219   |
| ENSG00000146733 | PSPH     | phosphoserine phosphatase                                                | 5723   |
| ENSG00000023909 | GCLM     | glutamate-cysteine ligase, modifier subunit                              | 2730   |
| ENSG00000116299 | KIAA1324 | KIAA1324                                                                 | 57535  |
| ENSG00000131080 | EDA2R    | ectodysplasin A2 receptor                                                | 60401  |
| ENSG00000152377 | SPOCK1   | sparc/osteonectin, cwcv and kazal-like domains proteoglycan (testican) 1 | 6695   |
| ENSG00000160200 | CBS      | cystathionine-beta-synthase                                              | 875    |
| ENSG00000130513 | GDF15    | growth differentiation factor 15                                         | 9518   |
| ENSG00000048052 | HDAC9    | histone deacetylase 9                                                    | 9734   |
| ENSG00000123094 | RASSF8   | Ras association (RalGDS/AF-6) domain family (N-terminal) member 8        | 11228  |
| ENSG00000148700 | ADD3     | adducin 3 (gamma)                                                        | 120    |
| ENSG00000170855 | TRIAP1   | TP53 regulated inhibitor of apoptosis 1                                  | 51499  |
| ENSG00000136560 | TANK     | TRAF family member-associated NFKB activator                             | 10010  |
| ENSG00000010278 | CD9      | CD9 molecule                                                             | 928    |
| ENSG00000087088 | BAX      | BCL2-associated X protein                                                | 581    |
| ENSG00000107796 | ACTA2    | actin, alpha 2, smooth muscle, aorta                                     | 59     |
| ENSG00000080824 | HSP90AA1 | heat shock protein 90kDa alpha (cytosolic), class A member 1             | 3320   |
| ENSG00000100889 | PCK2     | phosphoenolpyruvate carboxykinase 2 (mitochondrial)                      | 5106   |
| ENSG00000116285 | ERRFI1   | ERBB receptor feedback inhibitor 1                                       | 54206  |
| ENSG00000170801 | HTRA3    | HtrA serine peptidase 3                                                  | 94031  |
| ENSG00000185591 | SP1      | Sp1 transcription factor                                                 | 6667   |
| ENSG00000198431 | TXNRD1   | thioredoxin reductase 1                                                  | 7296   |
| ENSG00000184995 | IFNE     | interferon, epsilon                                                      | 338376 |
| ENSG00000001084 | GCLC     | glutamate-cysteine ligase, catalytic subunit                             | 2729   |

|                                                        |                                            |                                                                        |        |
|--------------------------------------------------------|--------------------------------------------|------------------------------------------------------------------------|--------|
| ENSG00000168243                                        | GNG4                                       | guanine nucleotide binding protein (G protein), gamma 4                | 2786   |
| ENSG00000181222                                        | POLR2A                                     | polymerase (RNA) II (DNA directed) polypeptide A, 220kDa               | 5430   |
| ENSG00000204388                                        | HSPA1B                                     | heat shock 70kDa protein 1B                                            | 3304   |
| ENSG00000135047                                        | CTSL1                                      | cathepsin L1                                                           | 1514   |
| ENSG00000117318                                        | ID3                                        | inhibitor of DNA binding 3, dominant negative helix-loop-helix protein | 3399   |
| ENSG00000116717                                        | GADD45A                                    | growth arrest and DNA-damage-inducible, alpha                          | 1647   |
| ENSG00000168685                                        | IL7R                                       | interleukin 7 receptor                                                 | 3575   |
| ENSG00000181026                                        | AEN                                        | apoptosis enhancing nuclease                                           | 64782  |
| ENSG00000132470                                        | ITGB4                                      | integrin, beta 4                                                       | 3691   |
| ENSG00000160570                                        | DEDD2                                      | death effector domain containing 2                                     | 162989 |
| ENSG00000174307                                        | PHLDA3                                     | pleckstrin homology-like domain, family A, member 3                    | 23612  |
| ENSG00000136002                                        | ARHGEF4                                    | Rho guanine nucleotide exchange factor (GEF) 4                         | 50649  |
| <b>Biological process</b>                              | <b>Response to unfolded protein</b>        | <b>GO:0006986</b>                                                      |        |
| C=129;O=15;E=1.74;R=8.64;rawP=1.91e-10;adjP=3.87e-08   |                                            |                                                                        |        |
| ENSG00000204390                                        | HSPA1L                                     | heat shock 70kDa protein 1-like                                        | 3305   |
| ENSG00000120694                                        | HSPH1                                      | heat shock 105kDa/110kDa protein 1                                     | 10808  |
| ENSG00000162616                                        | DNAJB4                                     | DnaJ (Hsp40) homolog, subfamily B, member 4                            | 11080  |
| ENSG00000070669                                        | ASNS                                       | asparagine synthetase (glutamine-hydrolyzing)                          | 440    |
| ENSG00000105993                                        | DNAJB6                                     | DnaJ (Hsp40) homolog, subfamily B, member 6                            | 10049  |
| ENSG00000087074                                        | PPP1R15A                                   | protein phosphatase 1, regulatory subunit 15A                          | 23645  |
| ENSG00000087088                                        | BAX                                        | BCL2-associated X protein                                              | 581    |
| ENSG00000162772                                        | ATF3                                       | activating transcription factor 3                                      | 467    |
| ENSG00000080824                                        | HSP90AA1                                   | heat shock protein 90kDa alpha (cytosolic), class A member 1           | 3320   |
| ENSG00000086061                                        | DNAJA1                                     | DnaJ (Hsp40) homolog, subfamily A, member 1                            | 3301   |
| ENSG00000132002                                        | DNAJB1                                     | DnaJ (Hsp40) homolog, subfamily B, member 1                            | 3337   |
| ENSG00000204388                                        | HSPA1B                                     | heat shock 70kDa protein 1B                                            | 3304   |
| ENSG00000116761                                        | CTH                                        | cystathionase (cystathionine gamma-lyase)                              | 1491   |
| ENSG00000173110                                        | HSPA6                                      | heat shock 70kDa protein 6 (HSP70B')                                   | 3310   |
| <b>Biological process</b>                              | <b>Regulation of programmed cell death</b> | <b>GO:0043067</b>                                                      |        |
| C=1126;O=43;E=15.16;R=2.84;rawP=2.44e-10;adjP=4.39e-08 |                                            |                                                                        |        |
| ENSG00000023909                                        | GCLM                                       | glutamate-cysteine ligase, modifier subunit                            | 2730   |
| ENSG00000116299                                        | KIAA1324                                   | KIAA1324                                                               | 57535  |
| ENSG00000091592                                        | NLRP1                                      | NLR family, pyrin domain containing 1                                  | 22861  |
| ENSG00000164938                                        | TP53INP1                                   | tumor protein p53 inducible nuclear protein 1                          | 94241  |
| ENSG00000124762                                        | CDKN1A                                     | cyclin-dependent kinase inhibitor 1A (p21, Cip1)                       | 1026   |
| ENSG00000100292                                        | HMOX1                                      | heme oxygenase (decycling) 1                                           | 3162   |
| ENSG00000139289                                        | PHLDA1                                     | pleckstrin homology-like domain, family A, member 1                    | 22822  |
| ENSG00000100625                                        | SIX4                                       | SIX homeobox 4                                                         | 51804  |
| ENSG00000196072                                        | BLOC1S2                                    | biogenesis of lysosomal organelles complex-1, subunit 2                | 282991 |
| ENSG00000085276                                        | MECOM                                      | MDS1 and EVI1 complex locus                                            | 2122   |
| ENSG00000168209                                        | DDIT4                                      | DNA-damage-inducible transcript 4                                      | 54541  |



|                                                        |                                 |                                                                        |        |
|--------------------------------------------------------|---------------------------------|------------------------------------------------------------------------|--------|
| ENSG00000198121                                        | LPAR1                           | lysophosphatidic acid receptor 1                                       | 1902   |
| ENSG00000151929                                        | BAG3                            | BCL2-associated athanogene 3                                           | 9531   |
| ENSG00000135679                                        | MDM2                            | Mdm2, p53 E3 ubiquitin protein ligase homolog (mouse)                  | 4193   |
| ENSG00000070669                                        | ASNS                            | asparagine synthetase (glutamine-hydrolyzing)                          | 440    |
| ENSG00000105993                                        | DNAJB6                          | DnaJ (Hsp40) homolog, subfamily B, member 6                            | 10049  |
| ENSG00000170855                                        | TRIAP1                          | TP53 regulated inhibitor of apoptosis 1                                | 51499  |
| ENSG00000184254                                        | ALDH1A3                         | aldehyde dehydrogenase 1 family, member A3                             | 220    |
| ENSG00000087088                                        | BAX                             | BCL2-associated X protein                                              | 581    |
| ENSG00000006327                                        | TNFRSF12A                       | tumor necrosis factor receptor superfamily, member 12A                 | 51330  |
| ENSG00000181104                                        | F2R                             | coagulation factor II (thrombin) receptor                              | 2149   |
| ENSG00000146674                                        | IGFBP3                          | insulin-like growth factor binding protein 3                           | 3486   |
| ENSG00000173846                                        | PLK3                            | polo-like kinase 3                                                     | 1263   |
| ENSG00000162734                                        | PEA15                           | phosphoprotein enriched in astrocytes 15                               | 8682   |
| ENSG00000108179                                        | PPIF                            | peptidylprolyl isomerase F                                             | 10105  |
| ENSG00000142168                                        | SOD1                            | superoxide dismutase 1, soluble                                        | 6647   |
| ENSG00000185088                                        | RPS27L                          | ribosomal protein S27-like                                             | 51065  |
| ENSG00000132170                                        | PPARG                           | peroxisome proliferator-activated receptor gamma                       | 5468   |
| ENSG00000001084                                        | GCLC                            | glutamate-cysteine ligase, catalytic subunit                           | 2729   |
| ENSG00000159388                                        | BTG2                            | BTG family, member 2                                                   | 7832   |
| ENSG00000115641                                        | FHL2                            | four and a half LIM domains 2                                          | 2274   |
| ENSG00000204388                                        | HSPA1B                          | heat shock 70kDa protein 1B                                            | 3304   |
| ENSG00000026103                                        | FAS                             | Fas (TNF receptor superfamily, member 6)                               | 355    |
| ENSG00000121691                                        | CAT                             | catalase                                                               | 847    |
| ENSG00000117318                                        | ID3                             | inhibitor of DNA binding 3, dominant negative helix-loop-helix protein | 3399   |
| ENSG00000181026                                        | AEN                             | apoptosis enhancing nuclease                                           | 64782  |
| ENSG00000105327                                        | BBC3                            | BCL2 binding component 3                                               | 27113  |
| ENSG00000120885                                        | CLU                             | clusterin                                                              | 1191   |
| ENSG00000174307                                        | PHLDA3                          | pleckstrin homology-like domain, family A, member 3                    | 23612  |
| ENSG00000160570                                        | DEDD2                           | death effector domain containing 2                                     | 162989 |
| <b>Biological process</b>                              | <b>Regulation of cell death</b> | <b>GO:0010941</b>                                                      |        |
| C=1153;O=43;E=15.52;R=2.77;rawP=5.12e-10;adjP=8.30e-08 |                                 |                                                                        |        |
| ENSG00000023909                                        | GCLM                            | glutamate-cysteine ligase, modifier subunit                            | 2730   |
| ENSG00000116299                                        | KIAA1324                        | KIAA1324                                                               | 57535  |
| ENSG00000091592                                        | NLRP1                           | NLR family, pyrin domain containing 1                                  | 22861  |
| ENSG00000164938                                        | TP53INP1                        | tumor protein p53 inducible nuclear protein 1                          | 94241  |
| ENSG00000124762                                        | CDKN1A                          | cyclin-dependent kinase inhibitor 1A (p21, Cip1)                       | 1026   |
| ENSG00000100292                                        | HMOX1                           | heme oxygenase (decycling) 1                                           | 3162   |
| ENSG00000139289                                        | PHLDA1                          | pleckstrin homology-like domain, family A, member 1                    | 22822  |
| ENSG00000100625                                        | SIX4                            | SIX homeobox 4                                                         | 51804  |
| ENSG00000196072                                        | BLOC1S2                         | biogenesis of lysosomal organelles complex-1, subunit 2                | 282991 |
| ENSG00000085276                                        | MECOM                           | MDS1 and EVI1 complex locus                                            | 2122   |
| ENSG00000168209                                        | DDIT4                           | DNA-damage-inducible transcript 4                                      | 54541  |
| ENSG00000198121                                        | LPAR1                           | lysophosphatidic acid receptor 1                                       | 1902   |
| ENSG00000151929                                        | BAG3                            | BCL2-associated athanogene 3                                           | 9531   |



|                                                         |                        |                                                                        |        |
|---------------------------------------------------------|------------------------|------------------------------------------------------------------------|--------|
| ENSG00000135679                                         | MDM2                   | Mdm2, p53 E3 ubiquitin protein ligase homolog (mouse)                  | 4193   |
| ENSG00000070669                                         | ASNS                   | asparagine synthetase (glutamine-hydrolyzing)                          | 440    |
| ENSG00000105993                                         | DNAJB6                 | DnaJ (Hsp40) homolog, subfamily B, member 6                            | 10049  |
| ENSG00000170855                                         | TRIAP1                 | TP53 regulated inhibitor of apoptosis 1                                | 51499  |
| ENSG00000184254                                         | ALDH1A3                | aldehyde dehydrogenase 1 family, member A3                             | 220    |
| ENSG00000087088                                         | BAX                    | BCL2-associated X protein                                              | 581    |
| ENSG00000006327                                         | TNFRSF12A              | tumor necrosis factor receptor superfamily, member 12A                 | 51330  |
| ENSG00000181104                                         | F2R                    | coagulation factor II (thrombin) receptor                              | 2149   |
| ENSG00000146674                                         | IGFBP3                 | insulin-like growth factor binding protein 3                           | 3486   |
| ENSG00000173846                                         | PLK3                   | polo-like kinase 3                                                     | 1263   |
| ENSG00000162734                                         | PEA15                  | phosphoprotein enriched in astrocytes 15                               | 8682   |
| ENSG00000108179                                         | PPIF                   | peptidylprolyl isomerase F                                             | 10105  |
| ENSG00000142168                                         | SOD1                   | superoxide dismutase 1, soluble                                        | 6647   |
| ENSG00000185088                                         | RPS27L                 | ribosomal protein S27-like                                             | 51065  |
| ENSG00000132170                                         | PPARG                  | peroxisome proliferator-activated receptor gamma                       | 5468   |
| ENSG00000001084                                         | GCLC                   | glutamate-cysteine ligase, catalytic subunit                           | 2729   |
| ENSG00000159388                                         | BTG2                   | BTG family, member 2                                                   | 7832   |
| ENSG00000115641                                         | FHL2                   | four and a half LIM domains 2                                          | 2274   |
| ENSG00000204388                                         | HSPA1B                 | heat shock 70kDa protein 1B                                            | 3304   |
| ENSG00000026103                                         | FAS                    | Fas (TNF receptor superfamily, member 6)                               | 355    |
| ENSG00000121691                                         | CAT                    | catalase                                                               | 847    |
| ENSG00000117318                                         | ID3                    | inhibitor of DNA binding 3, dominant negative helix-loop-helix protein | 3399   |
| ENSG00000181026                                         | AEN                    | apoptosis enhancing nuclease                                           | 64782  |
| ENSG00000105327                                         | BBC3                   | BCL2 binding component 3                                               | 27113  |
| ENSG00000120885                                         | CLU                    | clusterin                                                              | 1191   |
| ENSG00000174307                                         | PHLDA3                 | pleckstrin homology-like domain, family A, member 3                    | 23612  |
| ENSG00000160570                                         | DEDD2                  | death effector domain containing 2                                     | 162989 |
| <b>Molecular function</b>                               | <b>Protein binding</b> | <b>GO:000515</b>                                                       |        |
| C=7048;O=135;E=93.01;R=1.45;rawP=2.68e-10;adjP=6.97e-08 |                        |                                                                        |        |
| ENSG00000162616                                         | DNAJB4                 | DnaJ (Hsp40) homolog, subfamily B, member 4                            | 11080  |
| ENSG00000163257                                         | DCAF16                 | DDB1 and CUL4 associated factor 16                                     | 54876  |
| ENSG00000221926                                         | TRIM16                 | tripartite motif containing 16                                         | 10626  |
| ENSG00000091592                                         | NLRP1                  | NLR family, pyrin domain containing 1                                  | 22861  |
| ENSG00000146072                                         | TNFRSF21               | tumor necrosis factor receptor superfamily, member 21                  | 27242  |
| ENSG00000124762                                         | CDKN1A                 | cyclin-dependent kinase inhibitor 1A (p21, Cip1)                       | 1026   |
| ENSG00000104368                                         | PLAT                   | plasminogen activator, tissue                                          | 5327   |
| ENSG00000140941                                         | MAP1LC3B               | microtubule-associated protein 1 light chain 3 beta                    | 81631  |
| ENSG00000171517                                         | LPAR3                  | lysophosphatidic acid receptor 3                                       | 23566  |
| ENSG00000169136                                         | ATF5                   | activating transcription factor 5                                      | 22809  |
| ENSG00000198121                                         | LPAR1                  | lysophosphatidic acid receptor 1                                       | 1902   |
| ENSG00000151929                                         | BAG3                   | BCL2-associated athanogene 3                                           | 9531   |
| ENSG00000154175                                         | ABI3BP                 | ABI family, member 3 (NESH) binding protein                            | 25890  |
| ENSG00000128016                                         | ZFP36                  | zinc finger protein 36, C3H type, homolog (mouse)                      | 7538   |
| ENSG00000184254                                         | ALDH1A3                | aldehyde dehydrogenase 1 family, member A3                             | 220    |

|                 |           |                                                                                        |        |
|-----------------|-----------|----------------------------------------------------------------------------------------|--------|
| ENSG00000239713 | APOBEC3G  | apolipoprotein B mRNA editing enzyme, catalytic polypeptide-like 3G                    | 60489  |
| ENSG00000173846 | PLK3      | polo-like kinase 3                                                                     | 1263   |
| ENSG00000142168 | SOD1      | superoxide dismutase 1, soluble                                                        | 6647   |
| ENSG00000185088 | RPS27L    | ribosomal protein S27-like                                                             | 51065  |
| ENSG00000132170 | PPARG     | peroxisome proliferator-activated receptor gamma                                       | 5468   |
| ENSG00000197903 | HIST1H2BK | histone cluster 1, H2bk                                                                | 85236  |
| ENSG00000079308 | TNS1      | tensin 1                                                                               | 7145   |
| ENSG00000138413 | IDH1      | isocitrate dehydrogenase 1 (NADP+), soluble                                            | 3417   |
| ENSG00000160255 | ITGB2     | integrin, beta 2 (complement component 3 receptor 3 and 4 subunit)                     | 3689   |
| ENSG00000119630 | PGF       | placental growth factor                                                                | 5228   |
| ENSG00000186480 | INSIG1    | insulin induced gene 1                                                                 | 3638   |
| ENSG00000142627 | EPHA2     | EPH receptor A2                                                                        | 1969   |
| ENSG00000088356 | PDRG1     | p53 and DNA-damage regulated 1                                                         | 81572  |
| ENSG00000115919 | KYNU      | kynureninase                                                                           | 8942   |
| ENSG00000105327 | BBC3      | BCL2 binding component 3                                                               | 27113  |
| ENSG00000075223 | SEMA3C    | sema domain, immunoglobulin domain (Ig), short basic domain, secreted, (semaphorin) 3C | 10512  |
| ENSG00000120885 | CLU       | clusterin                                                                              | 1191   |
| ENSG00000120694 | HSPH1     | heat shock 105kDa/110kDa protein 1                                                     | 10808  |
| ENSG00000156273 | BACH1     | BTB and CNC homology 1, basic leucine zipper transcription factor 1                    | 571    |
| ENSG00000120738 | EGR1      | early growth response 1                                                                | 1958   |
| ENSG00000074590 | NUAK1     | NUAK family, SNF1-like kinase, 1                                                       | 9891   |
| ENSG00000164938 | TP53INP1  | tumor protein p53 inducible nuclear protein 1                                          | 94241  |
| ENSG00000197019 | SERTAD1   | SERTA domain containing 1                                                              | 29950  |
| ENSG00000102048 | ASB9      | ankyrin repeat and SOCS box containing 9                                               | 140462 |
| ENSG00000132002 | DNAJB1    | DnaJ (Hsp40) homolog, subfamily B, member 1                                            | 3337   |
| ENSG00000168209 | DDIT4     | DNA-damage-inducible transcript 4                                                      | 54541  |
| ENSG00000085276 | MECOM     | MDS1 and EVI1 complex locus                                                            | 2122   |
| ENSG00000161011 | SQSTM1    | sequestosome 1                                                                         | 8878   |
| ENSG00000072310 | SREBF1    | sterol regulatory element binding transcription factor 1                               | 6720   |
| ENSG00000006327 | TNFRSF12A | tumor necrosis factor receptor superfamily, member 12A                                 | 51330  |
| ENSG00000121931 | LRIF1     | ligand dependent nuclear receptor interacting factor 1                                 | 55791  |
| ENSG00000162734 | PEA15     | phosphoprotein enriched in astrocytes 15                                               | 8682   |
| ENSG00000134574 | DDB2      | damage-specific DNA binding protein 2, 48kDa                                           | 1643   |
| ENSG00000173614 | NMNAT1    | nicotinamide nucleotide adenylyltransferase 1                                          | 64802  |
| ENSG00000115641 | FHL2      | four and a half LIM domains 2                                                          | 2274   |
| ENSG00000179583 | CIITA     | class II, major histocompatibility complex, transactivator                             | 4261   |
| ENSG00000026103 | FAS       | Fas (TNF receptor superfamily, member 6)                                               | 355    |
| ENSG00000095383 | TBC1D2    | TBC1 domain family, member 2                                                           | 55357  |
| ENSG00000121691 | CAT       | catalase                                                                               | 847    |
| ENSG00000087074 | PPP1R15A  | protein phosphatase 1, regulatory subunit 15A                                          | 23645  |
| ENSG00000153879 | CEBPG     | CCAAT/enhancer binding protein (C/EBP), gamma                                          | 1054   |
| ENSG00000255150 | EID3      | EP300 interacting inhibitor of differentiation 3                                       | 493861 |
| ENSG00000101849 | TBL1X     | transducin (beta)-like 1X-linked                                                       | 6907   |

|                 |           |                                                            |        |
|-----------------|-----------|------------------------------------------------------------|--------|
| ENSG00000105939 | ZC3HAV1   | zinc finger CCCH-type, antiviral 1                         | 56829  |
| ENSG00000095752 | IL11      | interleukin 11                                             | 3589   |
| ENSG00000124496 | TRERF1    | transcriptional regulating factor 1                        | 55809  |
| ENSG00000170485 | NPAS2     | neuronal PAS domain protein 2                              | 4862   |
| ENSG00000162733 | DDR2      | discoidin domain receptor tyrosine kinase 2                | 4921   |
| ENSG00000167996 | FTH1      | ferritin, heavy polypeptide 1                              | 2495   |
| ENSG00000139289 | PHLDA1    | pleckstrin homology-like domain, family A, member 1        | 22822  |
| ENSG00000100292 | HMOX1     | heme oxygenase (decycling) 1                               | 3162   |
| ENSG00000125657 | TNFSF9    | tumor necrosis factor (ligand) superfamily, member 9       | 8744   |
| ENSG00000059728 | MXD1      | MAX dimerization protein 1                                 | 4084   |
| ENSG00000196072 | BLOC1S2   | biogenesis of lysosomal organelles complex-1, subunit 2    | 282991 |
| ENSG00000070669 | ASNS      | asparagine synthetase (glutamine-hydrolyzing)              | 440    |
| ENSG00000135679 | MDM2      | Mdm2, p53 E3 ubiquitin protein ligase homolog (mouse)      | 4193   |
| ENSG00000105993 | DNAJB6    | DnaJ (Hsp40) homolog, subfamily B, member 6                | 10049  |
| ENSG00000162892 | IL24      | interleukin 24                                             | 11009  |
| ENSG00000181104 | F2R       | coagulation factor II (thrombin) receptor                  | 2149   |
| ENSG00000063660 | GPC1      | glypican 1                                                 | 2817   |
| ENSG00000158373 | HIST1H2BD | histone cluster 1, H2bd                                    | 3017   |
| ENSG00000146674 | IGFBP3    | insulin-like growth factor binding protein 3               | 3486   |
| ENSG00000116761 | CTH       | cystathionase (cystathionine gamma-lyase)                  | 1491   |
| ENSG00000106105 | GARS      | glycyl-tRNA synthetase                                     | 2617   |
| ENSG00000159388 | BTG2      | BTG family, member 2                                       | 7832   |
| ENSG00000110172 | CHORDC1   | cysteine and histidine-rich domain (CHORD) containing 1    | 26973  |
| ENSG00000162772 | ATF3      | activating transcription factor 3                          | 467    |
| ENSG00000086061 | DNAJA1    | DnaJ (Hsp40) homolog, subfamily A, member 1                | 3301   |
| ENSG00000171617 | ENC1      | ectodermal-neural cortex 1 (with BTB-like domain)          | 8507   |
| ENSG00000162545 | CAMK2N1   | calcium/calmodulin-dependent protein kinase II inhibitor 1 | 55450  |
| ENSG00000160211 | G6PD      | glucose-6-phosphate dehydrogenase                          | 2539   |
| ENSG00000152137 | HSPB8     | heat shock 22kDa protein 8                                 | 26353  |
| ENSG00000106070 | GRB10     | growth factor receptor-bound protein 10                    | 2887   |
| ENSG00000134363 | FST       | follicle-stimulating hormone receptor 1                    | 10468  |
| ENSG00000170689 | HOXB9     | homeobox B9                                                | 3219   |
| ENSG00000146733 | PSPH      | phosphoserine phosphatase                                  | 5723   |
| ENSG00000023909 | GCLM      | glutamate-cysteine ligase, modifier subunit                | 2730   |
| ENSG00000131080 | EDA2R     | ectodysplasin A2 receptor                                  | 60401  |
| ENSG00000160200 | CBS       | cystathionine-beta-synthase                                | 875    |
| ENSG00000109220 | CHIC2     | cysteine-rich hydrophobic domain 2                         | 26511  |
| ENSG00000026950 | BTN3A1    | butyrophilin, subfamily 3, member A1                       | 11119  |
| ENSG00000130513 | GDF15     | growth differentiation factor 15                           | 9518   |
| ENSG00000048052 | HDAC9     | histone deacetylase 9                                      | 9734   |
| ENSG00000148700 | ADD3      | adducin 3 (gamma)                                          | 120    |
| ENSG00000170855 | TRIAP1    | TP53 regulated inhibitor of apoptosis 1                    | 51499  |
| ENSG00000136560 | TANK      | TRAF family member-associated NFKB activator               | 10010  |
| ENSG00000161513 | FDXR      | ferredoxin reductase                                       | 2232   |

|                                                     |                                      |                                                                                |        |
|-----------------------------------------------------|--------------------------------------|--------------------------------------------------------------------------------|--------|
| ENSG00000010278                                     | CD9                                  | CD9 molecule                                                                   | 928    |
| ENSG00000087088                                     | BAX                                  | BCL2-associated X protein                                                      | 581    |
| ENSG00000080824                                     | HSP90AA1                             | heat shock protein 90kDa alpha (cytosolic), class A member 1                   | 3320   |
| ENSG00000100889                                     | PCK2                                 | phosphoenolpyruvate carboxykinase 2 (mitochondrial)                            | 5106   |
| ENSG00000116285                                     | ERRF1                                | ERBB receptor feedback inhibitor 1                                             | 54206  |
| ENSG00000170801                                     | HTRA3                                | HtrA serine peptidase 3                                                        | 94031  |
| ENSG00000140961                                     | OSGIN1                               | oxidative stress induced growth inhibitor 1                                    | 29948  |
| ENSG00000185591                                     | SP1                                  | Sp1 transcription factor                                                       | 6667   |
| ENSG00000240694                                     | PNMA2                                | paraneoplastic Ma antigen 2                                                    | 10687  |
| ENSG00000184995                                     | IFNE                                 | interferon, epsilon                                                            | 338376 |
| ENSG00000143217                                     | PVRL4                                | poliovirus receptor-related 4                                                  | 81607  |
| ENSG00000001084                                     | GCLC                                 | glutamate-cysteine ligase, catalytic subunit                                   | 2729   |
| ENSG00000181222                                     | POLR2A                               | polymerase (RNA) II (DNA directed) polypeptide A, 220kDa                       | 5430   |
| ENSG00000204388                                     | HSPA1B                               | heat shock 70kDa protein 1B                                                    | 3304   |
| ENSG00000135047                                     | CTSL1                                | cathepsin L1                                                                   | 1514   |
| ENSG00000117318                                     | ID3                                  | inhibitor of DNA binding 3, dominant negative helix-loop-helix protein         | 3399   |
| ENSG00000116717                                     | GADD45A                              | growth arrest and DNA-damage-inducible, alpha                                  | 1647   |
| ENSG00000168685                                     | IL7R                                 | interleukin 7 receptor                                                         | 3575   |
| ENSG00000166897                                     | ELFN2                                | extracellular leucine-rich repeat and fibronectin type III domain containing 2 | 114794 |
| ENSG00000132470                                     | ITGB4                                | integrin, beta 4                                                               | 3691   |
| ENSG00000160570                                     | DEDD2                                | death effector domain containing 2                                             | 162989 |
| ENSG00000136002                                     | ARHGEF4                              | Rho guanine nucleotide exchange factor (GEF) 4                                 | 50649  |
| <b>Molecular function</b>                           | <b>Protein dimerization activity</b> | <b>GO:0046983</b>                                                              |        |
| C=926;O=31;E=12.22;R=2.54;rawP=1.41e-06;adjP=0.0001 |                                      |                                                                                |        |
| ENSG00000023909                                     | GCLM                                 | glutamate-cysteine ligase, modifier subunit                                    | 2730   |
| ENSG00000156273                                     | BACH1                                | BTB and CNC homology 1, basic leucine zipper transcription factor 1            | 571    |
| ENSG00000106105                                     | GARS                                 | glycyl-tRNA synthetase                                                         | 2617   |
| ENSG00000142168                                     | SOD1                                 | superoxide dismutase 1, soluble                                                | 6647   |
| ENSG00000170485                                     | NPAS2                                | neuronal PAS domain protein 2                                                  | 4862   |
| ENSG00000001084                                     | GCLC                                 | glutamate-cysteine ligase, catalytic subunit                                   | 2729   |
| ENSG00000197903                                     | HIST1H2BK                            | histone cluster 1, H2bk                                                        | 85236  |
| ENSG00000160200                                     | CBS                                  | cystathionine-beta-synthase                                                    | 875    |
| ENSG00000162772                                     | ATF3                                 | activating transcription factor 3                                              | 467    |
| ENSG00000100292                                     | HMOX1                                | heme oxygenase (decycling) 1                                                   | 3162   |
| ENSG00000138413                                     | IDH1                                 | isocitrate dehydrogenase 1 (NADP+), soluble                                    | 3417   |
| ENSG00000169136                                     | ATF5                                 | activating transcription factor 5                                              | 22809  |
| ENSG00000059728                                     | MXD1                                 | MAX dimerization protein 1                                                     | 4084   |
| ENSG00000085276                                     | MECOM                                | MDS1 and EVI1 complex locus                                                    | 2122   |
| ENSG00000119630                                     | PGF                                  | placental growth factor                                                        | 5228   |
| ENSG00000121691                                     | CAT                                  | catalase                                                                       | 847    |
| ENSG00000117318                                     | ID3                                  | inhibitor of DNA binding 3, dominant negative helix-loop-helix protein         | 3399   |

|                                                         |                         |                                                                     |        |
|---------------------------------------------------------|-------------------------|---------------------------------------------------------------------|--------|
| ENSG00000070669                                         | ASNS                    | asparagine synthetase (glutamine-hydrolyzing)                       | 440    |
| ENSG00000160211                                         | G6PD                    | glucose-6-phosphate dehydrogenase                                   | 2539   |
| ENSG00000115919                                         | KYNU                    | kynureninase                                                        | 8942   |
| ENSG00000184254                                         | ALDH1A3                 | aldehyde dehydrogenase 1 family, member A3                          | 220    |
| ENSG00000087088                                         | BAX                     | BCL2-associated X protein                                           | 581    |
| ENSG00000072310                                         | SREBF1                  | sterol regulatory element binding transcription factor 1            | 6720   |
| ENSG00000153879                                         | CEBPG                   | CCAAT/enhancer binding protein (C/EBP), gamma                       | 1054   |
| ENSG00000080824                                         | HSP90AA1                | heat shock protein 90kDa alpha (cytosolic), class A member 1        | 3320   |
| ENSG00000158373                                         | HIST1H2BD               | histone cluster 1, H2bd                                             | 3017   |
| ENSG00000239713                                         | APOBEC3G                | apolipoprotein B mRNA editing enzyme, catalytic polypeptide-like 3G | 60489  |
| ENSG00000146733                                         | PSPH                    | phosphoserine phosphatase                                           | 5723   |
| ENSG00000185591                                         | SP1                     | Sp1 transcription factor                                            | 6667   |
| <b>Molecular function</b>                               | <b>Cofactor binding</b> | <b>GO:0048037</b>                                                   |        |
| C=251;O=15;E=3.31;R=4.53;rawP=1.19e-06;adjP=0.0001      |                         |                                                                     |        |
| ENSG00000198431                                         | TXNRD1                  | thioredoxin reductase 1                                             | 7296   |
| ENSG00000121691                                         | CAT                     | catalase                                                            | 847    |
| ENSG00000166123                                         | GPT2                    | glutamic pyruvate transaminase (alanine aminotransferase) 2         | 84706  |
| ENSG00000070669                                         | ASNS                    | asparagine synthetase (glutamine-hydrolyzing)                       | 440    |
| ENSG00000135069                                         | PSAT1                   | phosphoserine aminotransferase 1                                    | 29968  |
| ENSG00000001084                                         | GCLC                    | glutamate-cysteine ligase, catalytic subunit                        | 2729   |
| ENSG00000160211                                         | G6PD                    | glucose-6-phosphate dehydrogenase                                   | 2539   |
| ENSG00000115919                                         | KYNU                    | kynureninase                                                        | 8942   |
| ENSG00000184254                                         | ALDH1A3                 | aldehyde dehydrogenase 1 family, member A3                          | 220    |
| ENSG00000109814                                         | UGDH                    | UDP-glucose 6-dehydrogenase                                         | 7358   |
| ENSG00000023330                                         | ALAS1                   | aminolevulinate, delta-, synthase 1                                 | 211    |
| ENSG00000160200                                         | CBS                     | cystathionine-beta-synthase                                         | 875    |
| ENSG00000138413                                         | IDH1                    | isocitrate dehydrogenase 1 (NADP+), soluble                         | 3417   |
| ENSG00000116761                                         | CTH                     | cystathionase (cystathionine gamma-lyase)                           | 1491   |
| <b>Molecular function</b>                               | <b>Binding</b>          | <b>GO:0005488</b>                                                   |        |
| C=11168;O=170;E=147.37;R=1.15;rawP=7.09e-06;adjP=0.0005 |                         |                                                                     |        |
| ENSG00000162616                                         | DNAJB4                  | DnaJ (Hsp40) homolog, subfamily B, member 4                         | 11080  |
| ENSG00000163257                                         | DCAF16                  | DDB1 and CUL4 associated factor 16                                  | 54876  |
| ENSG00000158286                                         | RNF207                  | ring finger protein 207                                             | 388591 |
| ENSG00000221926                                         | TRIM16                  | tripartite motif containing 16                                      | 10626  |
| ENSG00000091592                                         | NLRP1                   | NLR family, pyrin domain containing 1                               | 22861  |
| ENSG00000146072                                         | TNFRSF21                | tumor necrosis factor receptor superfamily, member 21               | 27242  |
| ENSG00000109814                                         | UGDH                    | UDP-glucose 6-dehydrogenase                                         | 7358   |
| ENSG00000128965                                         | CHAC1                   | ChaC, cation transport regulator homolog 1 (E. coli)                | 79094  |
| ENSG00000124762                                         | CDKN1A                  | cyclin-dependent kinase inhibitor 1A (p21, Cip1)                    | 1026   |
| ENSG00000128510                                         | CPA4                    | carboxypeptidase A4                                                 | 51200  |
| ENSG00000140941                                         | MAP1LC3B                | microtubule-associated protein 1 light chain 3 beta                 | 81631  |
| ENSG00000104368                                         | PLAT                    | plasminogen activator, tissue                                       | 5327   |
| ENSG00000141569                                         | TRIM65                  | tripartite motif containing 65                                      | 201292 |

|                 |           |                                                                                        |        |
|-----------------|-----------|----------------------------------------------------------------------------------------|--------|
| ENSG00000171517 | LPAR3     | lysophosphatidic acid receptor 3                                                       | 23566  |
| ENSG00000169136 | ATF5      | activating transcription factor 5                                                      | 22809  |
| ENSG00000112319 | EYA4      | eyes absent homolog 4 (Drosophila)                                                     | 2070   |
| ENSG00000099994 | SUSD2     | sushi domain containing 2                                                              | 56241  |
| ENSG00000151929 | BAG3      | BCL2-associated athanogene 3                                                           | 9531   |
| ENSG00000198121 | LPAR1     | lysophosphatidic acid receptor 1                                                       | 1902   |
| ENSG00000060140 | STYK1     | serine/threonine/tyrosine kinase 1                                                     | 55359  |
| ENSG00000154175 | ABI3BP    | ABI family, member 3 (NESH) binding protein                                            | 25890  |
| ENSG00000128016 | ZFP36     | zinc finger protein 36, C3H type, homolog (mouse)                                      | 7538   |
| ENSG00000184254 | ALDH1A3   | aldehyde dehydrogenase 1 family, member A3                                             | 220    |
| ENSG00000239713 | APOBEC3G  | apolipoprotein B mRNA editing enzyme, catalytic polypeptide-like 3G                    | 60489  |
| ENSG00000173846 | PLK3      | polo-like kinase 3                                                                     | 1263   |
| ENSG00000142168 | SOD1      | superoxide dismutase 1, soluble                                                        | 6647   |
| ENSG00000185088 | RPS27L    | ribosomal protein S27-like                                                             | 51065  |
| ENSG00000132170 | PPARG     | peroxisome proliferator-activated receptor gamma                                       | 5468   |
| ENSG00000197903 | HIST1H2BK | histone cluster 1, H2bk                                                                | 85236  |
| ENSG00000079308 | TNS1      | tensin 1                                                                               | 7145   |
| ENSG00000138413 | IDH1      | isocitrate dehydrogenase 1 (NADP+), soluble                                            | 3417   |
| ENSG00000173110 | HSPA6     | heat shock 70kDa protein 6 (HSP70B')                                                   | 3310   |
| ENSG00000147130 | ZMYM3     | zinc finger, MYM-type 3                                                                | 9203   |
| ENSG00000204390 | HSPA1L    | heat shock 70kDa protein 1-like                                                        | 3305   |
| ENSG00000119630 | PGF       | placental growth factor                                                                | 5228   |
| ENSG00000160255 | ITGB2     | integrin, beta 2 (complement component 3 receptor 3 and 4 subunit)                     | 3689   |
| ENSG00000142627 | EPHA2     | EPH receptor A2                                                                        | 1969   |
| ENSG00000186480 | INSIG1    | insulin induced gene 1                                                                 | 3638   |
| ENSG00000088356 | PDRG1     | p53 and DNA-damage regulated 1                                                         | 81572  |
| ENSG00000115919 | KYNU      | kynureninase                                                                           | 8942   |
| ENSG00000023330 | ALAS1     | aminolevulinate, delta-, synthase 1                                                    | 211    |
| ENSG00000105327 | BBC3      | BCL2 binding component 3                                                               | 27113  |
| ENSG00000075223 | SEMA3C    | sema domain, immunoglobulin domain (Ig), short basic domain, secreted, (semaphorin) 3C | 10512  |
| ENSG00000120885 | CLU       | clusterin                                                                              | 1191   |
| ENSG00000166123 | GPT2      | glutamic pyruvate transaminase (alanine aminotransferase) 2                            | 84706  |
| ENSG00000120694 | HSPH1     | heat shock 105kDa/110kDa protein 1                                                     | 10808  |
| ENSG00000156273 | BACH1     | BTB and CNC homology 1, basic leucine zipper transcription factor 1                    | 571    |
| ENSG00000120738 | EGR1      | early growth response 1                                                                | 1958   |
| ENSG00000074590 | NUAK1     | NUAK family, SNF1-like kinase, 1                                                       | 9891   |
| ENSG00000164938 | TP53INP1  | tumor protein p53 inducible nuclear protein 1                                          | 94241  |
| ENSG00000197019 | SERTAD1   | SERTA domain containing 1                                                              | 29950  |
| ENSG00000102048 | ASB9      | ankyrin repeat and SOCS box containing 9                                               | 140462 |
| ENSG00000132002 | DNAJB1    | DnaJ (Hsp40) homolog, subfamily B, member 1                                            | 3337   |
| ENSG00000168209 | DDIT4     | DNA-damage-inducible transcript 4                                                      | 54541  |
| ENSG00000085276 | MECOM     | MDS1 and EVI1 complex locus                                                            | 2122   |
| ENSG00000148288 | GBGT1     | globoside alpha-1,3-N-acetylgalactosaminyltransferase 1                                | 26301  |

|                 |           |                                                                                                      |        |
|-----------------|-----------|------------------------------------------------------------------------------------------------------|--------|
| ENSG00000161011 | SQSTM1    | sequestosome 1                                                                                       | 8878   |
| ENSG00000112297 | AIM1      | absent in melanoma 1                                                                                 | 202    |
| ENSG00000072310 | SREBF1    | sterol regulatory element binding transcription factor 1                                             | 6720   |
| ENSG00000006327 | TNFRSF12A | tumor necrosis factor receptor superfamily, member 12A                                               | 51330  |
| ENSG00000146453 | PNLDC1    | poly(A)-specific ribonuclease (PARN)-like domain containing 1                                        | 154197 |
| ENSG00000121931 | LRIF1     | ligand dependent nuclear receptor interacting factor 1                                               | 55791  |
| ENSG00000003137 | CYP26B1   | cytochrome P450, family 26, subfamily B, polypeptide 1                                               | 56603  |
| ENSG00000162734 | PEA15     | phosphoprotein enriched in astrocytes 15                                                             | 8682   |
| ENSG00000134574 | DDB2      | damage-specific DNA binding protein 2, 48kDa                                                         | 1643   |
| ENSG00000173614 | NMNAT1    | nicotinamide nucleotide adenyltransferase 1                                                          | 64802  |
| ENSG00000115641 | FHL2      | four and a half LIM domains 2                                                                        | 2274   |
| ENSG00000154556 | SORBS2    | sorbin and SH3 domain containing 2                                                                   | 8470   |
| ENSG00000179583 | CIITA     | class II, major histocompatibility complex, transactivator                                           | 4261   |
| ENSG00000095383 | TBC1D2    | TBC1 domain family, member 2                                                                         | 55357  |
| ENSG00000026103 | FAS       | Fas (TNF receptor superfamily, member 6)                                                             | 355    |
| ENSG00000121691 | CAT       | catalase                                                                                             | 847    |
| ENSG00000065911 | MTHFD2    | methylenetetrahydrofolate dehydrogenase (NADP+ dependent) 2, methenyltetrahydrofolate cyclohydrolase | 10797  |
| ENSG00000087074 | PPP1R15A  | protein phosphatase 1, regulatory subunit 15A                                                        | 23645  |
| ENSG00000153879 | CEBPG     | CCAAT/enhancer binding protein (C/EBP), gamma                                                        | 1054   |
| ENSG00000255150 | EID3      | EP300 interacting inhibitor of differentiation 3                                                     | 493861 |
| ENSG00000101849 | TBL1X     | transducin (beta)-like 1X-linked                                                                     | 6907   |
| ENSG00000105939 | ZC3HAV1   | zinc finger CCCH-type, antiviral 1                                                                   | 56829  |
| ENSG00000095752 | IL11      | interleukin 11                                                                                       | 3589   |
| ENSG00000124496 | TRERF1    | transcriptional regulating factor 1                                                                  | 55809  |
| ENSG00000170485 | NPAS2     | neuronal PAS domain protein 2                                                                        | 4862   |
| ENSG00000162733 | DDR2      | discoidin domain receptor tyrosine kinase 2                                                          | 4921   |
| ENSG00000139289 | PHLDA1    | pleckstrin homology-like domain, family A, member 1                                                  | 22822  |
| ENSG00000100292 | HMOX1     | heme oxygenase (decycling) 1                                                                         | 3162   |
| ENSG00000125657 | TNFSF9    | tumor necrosis factor (ligand) superfamily, member 9                                                 | 8744   |
| ENSG00000059728 | MXD1      | MAX dimerization protein 1                                                                           | 4084   |
| ENSG00000196072 | BLOC1S2   | biogenesis of lysosomal organelles complex-1, subunit 2                                              | 282991 |
| ENSG00000178381 | ZFAND2A   | zinc finger, AN1-type domain 2A                                                                      | 90637  |
| ENSG00000070669 | ASNS      | asparagine synthetase (glutamine-hydrolyzing)                                                        | 440    |
| ENSG00000135679 | MDM2      | Mdm2, p53 E3 ubiquitin protein ligase homolog (mouse)                                                | 4193   |
| ENSG00000105993 | DNAJB6    | DnaJ (Hsp40) homolog, subfamily B, member 6                                                          | 10049  |
| ENSG00000162892 | IL24      | interleukin 24                                                                                       | 11009  |
| ENSG00000181104 | F2R       | coagulation factor II (thrombin) receptor                                                            | 2149   |
| ENSG00000063660 | GPC1      | glypican 1                                                                                           | 2817   |
| ENSG00000158373 | HIST1H2BD | histone cluster 1, H2bd                                                                              | 3017   |
| ENSG00000146674 | IGFBP3    | insulin-like growth factor binding protein 3                                                         | 3486   |
| ENSG00000116761 | CTH       | cystathionase (cystathionine gamma-lyase)                                                            | 1491   |
| ENSG00000108179 | PPIF      | peptidylprolyl isomerase F                                                                           | 10105  |
| ENSG00000106105 | GARS      | glycyl-tRNA synthetase                                                                               | 2617   |
| ENSG00000159388 | BTG2      | BTG family, member 2                                                                                 | 7832   |

|                 |          |                                                                          |        |
|-----------------|----------|--------------------------------------------------------------------------|--------|
| ENSG00000110172 | CHORDC1  | cysteine and histidine-rich domain (CHORD) containing 1                  | 26973  |
| ENSG00000162772 | ATF3     | activating transcription factor 3                                        | 467    |
| ENSG00000086061 | DNAJA1   | DnaJ (Hsp40) homolog, subfamily A, member 1                              | 3301   |
| ENSG00000171617 | ENC1     | ectodermal-neural cortex 1 (with BTB-like domain)                        | 8507   |
| ENSG00000162545 | CAMK2N1  | calcium/calmodulin-dependent protein kinase II inhibitor 1               | 55450  |
| ENSG00000160211 | G6PD     | glucose-6-phosphate dehydrogenase                                        | 2539   |
| ENSG00000152137 | HSPB8    | heat shock 22kDa protein 8                                               | 26353  |
| ENSG00000106070 | GRB10    | growth factor receptor-bound protein 10                                  | 2887   |
| ENSG00000129282 | MRM1     | mitochondrial rRNA methyltransferase 1 homolog (S. cerevisiae)           | 79922  |
| ENSG00000134363 | FST      | follistatin                                                              | 10468  |
| ENSG00000170689 | HOXB9    | homeobox B9                                                              | 3219   |
| ENSG00000146733 | PSPH     | phosphoserine phosphatase                                                | 5723   |
| ENSG00000023909 | GCLM     | glutamate-cysteine ligase, modifier subunit                              | 2730   |
| ENSG00000131080 | EDA2R    | ectodysplasin A2 receptor                                                | 60401  |
| ENSG00000152377 | SPOCK1   | sparc/osteonectin, cwcv and kazal-like domains proteoglycan (testican) 1 | 6695   |
| ENSG00000026950 | BTN3A1   | butyrophilin, subfamily 3, member A1                                     | 11119  |
| ENSG00000109220 | CHIC2    | cysteine-rich hydrophobic domain 2                                       | 26511  |
| ENSG00000160200 | CBS      | cystathionine-beta-synthase                                              | 875    |
| ENSG00000130513 | GDF15    | growth differentiation factor 15                                         | 9518   |
| ENSG00000100625 | SIX4     | SIX homeobox 4                                                           | 51804  |
| ENSG00000048052 | HDAC9    | histone deacetylase 9                                                    | 9734   |
| ENSG00000148700 | ADD3     | adducin 3 (gamma)                                                        | 120    |
| ENSG00000161513 | FDXR     | ferredoxin reductase                                                     | 2232   |
| ENSG00000136560 | TANK     | TRAF family member-associated NFKB activator                             | 10010  |
| ENSG00000170855 | TRIAP1   | TP53 regulated inhibitor of apoptosis 1                                  | 51499  |
| ENSG00000087088 | BAX      | BCL2-associated X protein                                                | 581    |
| ENSG00000010278 | CD9      | CD9 molecule                                                             | 928    |
| ENSG00000107796 | ACTA2    | actin, alpha 2, smooth muscle, aorta                                     | 59     |
| ENSG00000080824 | HSP90AA1 | heat shock protein 90kDa alpha (cytosolic), class A member 1             | 3320   |
| ENSG00000170801 | HTRA3    | HtrA serine peptidase 3                                                  | 94031  |
| ENSG00000116285 | ERRFI1   | ERBB receptor feedback inhibitor 1                                       | 54206  |
| ENSG00000100889 | PCK2     | phosphoenolpyruvate carboxykinase 2 (mitochondrial)                      | 5106   |
| ENSG00000140961 | OSGIN1   | oxidative stress induced growth inhibitor 1                              | 29948  |
| ENSG00000240694 | PNMA2    | paraneoplastic Ma antigen 2                                              | 10687  |
| ENSG00000185591 | SP1      | Sp1 transcription factor                                                 | 6667   |
| ENSG00000143217 | PVRL4    | poliovirus receptor-related 4                                            | 81607  |
| ENSG00000184995 | IFNE     | interferon, epsilon                                                      | 338376 |
| ENSG00000198431 | TXNRD1   | thioredoxin reductase 1                                                  | 7296   |
| ENSG00000135069 | PSAT1    | phosphoserine aminotransferase 1                                         | 29968  |
| ENSG00000156218 | ADAMTSL3 | ADAMTS-like 3                                                            | 57188  |
| ENSG00000001084 | GCLC     | glutamate-cysteine ligase, catalytic subunit                             | 2729   |
| ENSG00000160161 | CILP2    | cartilage intermediate layer protein 2                                   | 148113 |



|                                                     |                                  |                                                                                |        |
|-----------------------------------------------------|----------------------------------|--------------------------------------------------------------------------------|--------|
| ENSG00000181222                                     | POLR2A                           | polymerase (RNA) II (DNA directed) polypeptide A, 220kDa                       | 5430   |
| ENSG00000204388                                     | HSPA1B                           | heat shock 70kDa protein 1B                                                    | 3304   |
| ENSG00000135047                                     | CTSL1                            | cathepsin L1                                                                   | 1514   |
| ENSG00000117318                                     | ID3                              | inhibitor of DNA binding 3, dominant negative helix-loop-helix protein         | 3399   |
| ENSG00000116717                                     | GADD45A                          | growth arrest and DNA-damage-inducible, alpha                                  | 1647   |
| ENSG00000168685                                     | IL7R                             | interleukin 7 receptor                                                         | 3575   |
| ENSG00000166897                                     | ELFN2                            | extracellular leucine-rich repeat and fibronectin type III domain containing 2 | 114794 |
| ENSG00000181026                                     | AEN                              | apoptosis enhancing nuclease                                                   | 64782  |
| ENSG00000221963                                     | APOL6                            | apolipoprotein L, 6                                                            | 80830  |
| ENSG00000118496                                     | FBXO30                           | F-box protein 30                                                               | 84085  |
| ENSG00000132470                                     | ITGB4                            | integrin, beta 4                                                               | 3691   |
| ENSG00000174307                                     | PHLDA3                           | pleckstrin homology-like domain, family A, member 3                            | 23612  |
| ENSG00000160570                                     | DEDD2                            | death effector domain containing 2                                             | 162989 |
| ENSG00000136002                                     | ARHGEF4                          | Rho guanine nucleotide exchange factor (GEF) 4                                 | 50649  |
| <b>Molecular function</b>                           | <b>Identical protein binding</b> | <b>GO:0042802</b>                                                              |        |
| C=836;O=27;E=11.03;R=2.45;rawP=1.41e-05;adjP=0.0007 |                                  |                                                                                |        |
| ENSG00000142168                                     | SOD1                             | superoxide dismutase 1, soluble                                                | 6647   |
| ENSG00000115641                                     | FHL2                             | four and a half LIM domains 2                                                  | 2274   |
| ENSG00000160200                                     | CBS                              | cystathionine-beta-synthase                                                    | 875    |
| ENSG00000162772                                     | ATF3                             | activating transcription factor 3                                              | 467    |
| ENSG00000100292                                     | HMOX1                            | heme oxygenase (decycling) 1                                                   | 3162   |
| ENSG00000138413                                     | IDH1                             | isocitrate dehydrogenase 1 (NADP+), soluble                                    | 3417   |
| ENSG00000026103                                     | FAS                              | Fas (TNF receptor superfamily, member 6)                                       | 355    |
| ENSG00000085276                                     | MECOM                            | MDS1 and EVI1 complex locus                                                    | 2122   |
| ENSG00000119630                                     | PGF                              | placental growth factor                                                        | 5228   |
| ENSG00000121691                                     | CAT                              | catalase                                                                       | 847    |
| ENSG00000135679                                     | MDM2                             | Mdm2, p53 E3 ubiquitin protein ligase homolog (mouse)                          | 4193   |
| ENSG00000070669                                     | ASNS                             | asparagine synthetase (glutamine-hydrolyzing)                                  | 440    |
| ENSG00000161011                                     | SQSTM1                           | sequestosome 1                                                                 | 8878   |
| ENSG00000160211                                     | G6PD                             | glucose-6-phosphate dehydrogenase                                              | 2539   |
| ENSG00000115919                                     | KYNU                             | kynureninase                                                                   | 8942   |
| ENSG00000184254                                     | ALDH1A3                          | aldehyde dehydrogenase 1 family, member A3                                     | 220    |
| ENSG00000087088                                     | BAX                              | BCL2-associated X protein                                                      | 581    |
| ENSG00000152137                                     | HSPB8                            | heat shock 22kDa protein 8                                                     | 26353  |
| ENSG00000153879                                     | CEBPG                            | CCAAT/enhancer binding protein (C/EBP), gamma                                  | 1054   |
| ENSG00000255150                                     | EID3                             | EP300 interacting inhibitor of differentiation 3                               | 493861 |
| ENSG00000080824                                     | HSP90AA1                         | heat shock protein 90kDa alpha (cytosolic), class A member 1                   | 3320   |
| ENSG00000239713                                     | APOBEC3G                         | apolipoprotein B mRNA editing enzyme, catalytic polypeptide-like 3G            | 60489  |
| ENSG00000146733                                     | PSPH                             | phosphoserine phosphatase                                                      | 5723   |
| ENSG00000185591                                     | SP1                              | Sp1 transcription factor                                                       | 6667   |
| <b>Molecular function</b>                           | <b>Vitamin B6 binding</b>        | <b>GO:0070279</b>                                                              |        |

| C=54;O=6;E=0.71;R=8.42;rawP=7.44e-05;adjP=0.0028 |                                           |                                                                     |       |
|--------------------------------------------------|-------------------------------------------|---------------------------------------------------------------------|-------|
| ENSG00000160200                                  | CBS                                       | cystathionine-beta-synthase                                         | 875   |
| ENSG00000166123                                  | GPT2                                      | glutamic pyruvate transaminase (alanine aminotransferase) 2         | 84706 |
| ENSG00000135069                                  | PSAT1                                     | phosphoserine aminotransferase 1                                    | 29968 |
| ENSG00000115919                                  | KYNU                                      | kynureninase                                                        | 8942  |
| ENSG00000116761                                  | CTH                                       | cystathionase (cystathionine gamma-lyase)                           | 1491  |
| ENSG00000023330                                  | ALAS1                                     | aminolevulinate, delta-, synthase 1                                 | 211   |
| <b>Molecular function</b>                        | <b>Pyridoxal phosphate binding</b>        | <b>GO:0030170</b>                                                   |       |
| C=54;O=6;E=0.71;R=8.42;rawP=7.44e-05;adjP=0.0028 |                                           |                                                                     |       |
| ENSG00000160200                                  | CBS                                       | cystathionine-beta-synthase                                         | 875   |
| ENSG00000166123                                  | GPT2                                      | glutamic pyruvate transaminase (alanine aminotransferase) 2         | 84706 |
| ENSG00000135069                                  | PSAT1                                     | phosphoserine aminotransferase 1                                    | 29968 |
| ENSG00000115919                                  | KYNU                                      | kynureninase                                                        | 8942  |
| ENSG00000116761                                  | CTH                                       | cystathionase (cystathionine gamma-lyase)                           | 1491  |
| ENSG00000023330                                  | ALAS1                                     | aminolevulinate, delta-, synthase 1                                 | 211   |
| <b>Molecular function</b>                        | <b>Glutamate-cysteine ligase activity</b> | <b>GO:0004357</b>                                                   |       |
| C=2;O=2;E=0.03;R=75.78;rawP=0.0002;adjP=0.0065   |                                           |                                                                     |       |
| ENSG00000023909                                  | GCLM                                      | glutamate-cysteine ligase, modifier subunit                         | 2730  |
| ENSG00000001084                                  | GCLC                                      | glutamate-cysteine ligase, catalytic subunit                        | 2729  |
| <b>Molecular function</b>                        | <b>Protein homodimerization activity</b>  | <b>GO:0042803</b>                                                   |       |
| C=551;O=18;E=7.27;R=2.48;rawP=0.0004;adjP=0.0116 |                                           |                                                                     |       |
| ENSG00000142168                                  | SOD1                                      | superoxide dismutase 1, soluble                                     | 6647  |
| ENSG00000160200                                  | CBS                                       | cystathionine-beta-synthase                                         | 875   |
| ENSG00000100292                                  | HMOX1                                     | heme oxygenase (decycling) 1                                        | 3162  |
| ENSG00000138413                                  | IDH1                                      | isocitrate dehydrogenase 1 (NADP+), soluble                         | 3417  |
| ENSG00000085276                                  | MECOM                                     | MDS1 and EVI1 complex locus                                         | 2122  |
| ENSG00000119630                                  | PGF                                       | placental growth factor                                             | 5228  |
| ENSG00000121691                                  | CAT                                       | catalase                                                            | 847   |
| ENSG00000070669                                  | ASNS                                      | asparagine synthetase (glutamine-hydrolyzing)                       | 440   |
| ENSG00000115919                                  | KYNU                                      | kynureninase                                                        | 8942  |
| ENSG00000160211                                  | G6PD                                      | glucose-6-phosphate dehydrogenase                                   | 2539  |
| ENSG00000184254                                  | ALDH1A3                                   | aldehyde dehydrogenase 1 family, member A3                          | 220   |
| ENSG00000153879                                  | CEBPG                                     | CCAAT/enhancer binding protein (C/EBP), gamma                       | 1054  |
| ENSG00000087088                                  | BAX                                       | BCL2-associated X protein                                           | 581   |
| ENSG00000080824                                  | HSP90AA1                                  | heat shock protein 90kDa alpha (cytosolic), class A member 1        | 3320  |
| ENSG00000239713                                  | APOBEC3G                                  | apolipoprotein B mRNA editing enzyme, catalytic polypeptide-like 3G | 60489 |
| ENSG00000146733                                  | PSPH                                      | phosphoserine phosphatase                                           | 5723  |
| ENSG00000185591                                  | SP1                                       | Sp1 transcription factor                                            | 6667  |

|                                                    |                                                |                                                                     |        |
|----------------------------------------------------|------------------------------------------------|---------------------------------------------------------------------|--------|
| <b>Molecular function</b>                          | <b>Lysophosphatidic acid receptor activity</b> | <b>GO:0070915</b>                                                   |        |
| C=3;O=2;E=0.04;R=50.52;rawP=0.0005;adjP=0.0118     |                                                |                                                                     |        |
| ENSG00000198121                                    | LPAR1                                          | lysophosphatidic acid receptor 1                                    | 1902   |
| ENSG00000171517                                    | LPAR3                                          | lysophosphatidic acid receptor 3                                    | 23566  |
| <b>Cellular component</b>                          | <b>lysophosphatidic acid receptor activity</b> | <b>GO:0070915</b>                                                   |        |
| C=2;O=2;E=0.02;R=80.98;rawP=0.0002;adjP=0.0116     |                                                |                                                                     |        |
| ENSG00000167996                                    | FTH1                                           | ferritin, heavy polypeptide 1                                       | 2495   |
| ENSG00000087086                                    | FTL                                            | ferritin, light polypeptide                                         | 2512   |
| <b>Cellular component</b>                          | <b>Intracellular ferritin complex</b>          | <b>GO:0008043</b>                                                   |        |
| C=2;O=2;E=0.02;R=80.98;rawP=0.0002;adjP=0.0116     |                                                |                                                                     |        |
| ENSG00000167996                                    | FTH1                                           | ferritin, heavy polypeptide 1                                       | 2495   |
| ENSG00000087086                                    | FTL                                            | ferritin, light polypeptide                                         | 2512   |
| <b>Cellular component</b>                          | <b>Glutamate-cysteine ligase complex</b>       | <b>GO:0017109</b>                                                   |        |
| C=2;O=2;E=0.02;R=80.98;rawP=0.0002;adjP=0.0116     |                                                |                                                                     |        |
| ENSG00000023909                                    | GCLM                                           | glutamate-cysteine ligase, modifier subunit                         | 2730   |
| ENSG00000001084                                    | GCLC                                           | glutamate-cysteine ligase, catalytic subunit                        | 2729   |
| <b>Cellular component</b>                          | <b>Cytosol</b>                                 | <b>GO:0005829</b>                                                   |        |
| C=2304;O=46;E=28.45;R=1.62;rawP=0.0005;adjP=0.0217 |                                                |                                                                     |        |
| ENSG00000023909                                    | GCLM                                           | glutamate-cysteine ligase, modifier subunit                         | 2730   |
| ENSG00000156273                                    | BACH1                                          | BTB and CNC homology 1, basic leucine zipper transcription factor 1 | 571    |
| ENSG00000091592                                    | NLRP1                                          | NLR family, pyrin domain containing 1                               | 22861  |
| ENSG00000170485                                    | NPAS2                                          | neuronal PAS domain protein 2                                       | 4862   |
| ENSG00000164938                                    | TP53INP1                                       | tumor protein p53 inducible nuclear protein 1                       | 94241  |
| ENSG00000109814                                    | UGDH                                           | UDP-glucose 6-dehydrogenase                                         | 7358   |
| ENSG00000160200                                    | CBS                                            | cystathionine-beta-synthase                                         | 875    |
| ENSG00000124762                                    | CDKN1A                                         | cyclin-dependent kinase inhibitor 1A (p21, Cip1)                    | 1026   |
| ENSG00000100292                                    | HMOX1                                          | heme oxygenase (decycling) 1                                        | 3162   |
| ENSG00000196072                                    | BLOC1S2                                        | biogenesis of lysosomal organelles complex-1, subunit 2             | 282991 |
| ENSG00000151929                                    | BAG3                                           | BCL2-associated athanogene 3                                        | 9531   |
| ENSG00000135679                                    | MDM2                                           | Mdm2, p53 E3 ubiquitin protein ligase homolog (mouse)               | 4193   |
| ENSG00000070669                                    | ASNS                                           | asparagine synthetase (glutamine-hydrolyzing)                       | 440    |
| ENSG00000161011                                    | SQSTM1                                         | sequestosome 1                                                      | 8878   |
| ENSG00000128016                                    | ZFP36                                          | zinc finger protein 36, C3H type, homolog (mouse)                   | 7538   |
| ENSG00000136560                                    | TANK                                           | TRAF family member-associated NFKB activator                        | 10010  |
| ENSG00000087088                                    | BAX                                            | BCL2-associated X protein                                           | 581    |
| ENSG00000107796                                    | ACTA2                                          | actin, alpha 2, smooth muscle, aorta                                | 59     |
| ENSG00000080824                                    | HSP90AA1                                       | heat shock protein 90kDa alpha (cytosolic), class A member 1        | 3320   |

|                                                    |                                      |                                                                     |        |
|----------------------------------------------------|--------------------------------------|---------------------------------------------------------------------|--------|
| ENSG00000239713                                    | APOBEC3G                             | apolipoprotein B mRNA editing enzyme, catalytic polypeptide-like 3G | 60489  |
| ENSG00000116761                                    | CTH                                  | cystathionase (cystathionine gamma-lyase)                           | 1491   |
| ENSG00000198431                                    | TXNRD1                               | thioredoxin reductase 1                                             | 7296   |
| ENSG00000087086                                    | FTL                                  | ferritin, light polypeptide                                         | 2512   |
| ENSG00000142168                                    | SOD1                                 | superoxide dismutase 1, soluble                                     | 6647   |
| ENSG00000106105                                    | GARS                                 | glycyl-tRNA synthetase                                              | 2617   |
| ENSG00000135069                                    | PSAT1                                | phosphoserine aminotransferase 1                                    | 29968  |
| ENSG00000132170                                    | PPARG                                | peroxisome proliferator-activated receptor gamma                    | 5468   |
| ENSG00000001084                                    | GCLC                                 | glutamate-cysteine ligase, catalytic subunit                        | 2729   |
| ENSG00000138413                                    | IDH1                                 | isocitrate dehydrogenase 1 (NADP+), soluble                         | 3417   |
| ENSG00000204388                                    | HSPA1B                               | heat shock 70kDa protein 1B                                         | 3304   |
| ENSG00000026103                                    | FAS                                  | Fas (TNF receptor superfamily, member 6)                            | 355    |
| ENSG00000121691                                    | CAT                                  | catalase                                                            | 847    |
| ENSG00000088356                                    | PDRG1                                | p53 and DNA-damage regulated 1                                      | 81572  |
| ENSG00000115919                                    | KYNU                                 | kynureninase                                                        | 8942   |
| ENSG00000087074                                    | PPP1R15A                             | protein phosphatase 1, regulatory subunit 15A                       | 23645  |
| ENSG00000160211                                    | G6PD                                 | glucose-6-phosphate dehydrogenase                                   | 2539   |
| ENSG00000105327                                    | BBC3                                 | BCL2 binding component 3                                            | 27113  |
| ENSG00000106070                                    | GRB10                                | growth factor receptor-bound protein 10                             | 2887   |
| ENSG00000120885                                    | CLU                                  | clusterin                                                           | 1191   |
| ENSG00000146733                                    | PSPH                                 | phosphoserine phosphatase                                           | 5723   |
| ENSG00000136002                                    | ARHGEF4                              | Rho guanine nucleotide exchange factor (GEF) 4                      | 50649  |
| <b>Cellular component</b>                          | <b>Intracellular organelle lumen</b> | <b>GO:0070013</b>                                                   |        |
| C=3164;O=57;E=39.07;R=1.46;rawP=0.0013;adjP=0.0373 |                                      |                                                                     |        |
| ENSG00000166123                                    | GPT2                                 | glutamic pyruvate transaminase (alanine aminotransferase) 2         | 84706  |
| ENSG00000120694                                    | HSPH1                                | heat shock 105kDa/110kDa protein 1                                  | 10808  |
| ENSG00000162616                                    | DNAJB4                               | DnaJ (Hsp40) homolog, subfamily B, member 4                         | 11080  |
| ENSG00000120738                                    | EGR1                                 | early growth response 1                                             | 1958   |
| ENSG00000221926                                    | TRIM16                               | tripartite motif containing 16                                      | 10626  |
| ENSG00000170485                                    | NPAS2                                | neuronal PAS domain protein 2                                       | 4862   |
| ENSG00000002587                                    | HS3ST1                               | heparan sulfate (glucosamine) 3-O-sulfotransferase 1                | 9957   |
| ENSG00000164938                                    | TP53INP1                             | tumor protein p53 inducible nuclear protein 1                       | 94241  |
| ENSG00000102048                                    | ASB9                                 | ankyrin repeat and SOCS box containing 9                            | 140462 |
| ENSG00000160200                                    | CBS                                  | cystathionine-beta-synthase                                         | 875    |
| ENSG00000132002                                    | DNAJB1                               | DnaJ (Hsp40) homolog, subfamily B, member 1                         | 3337   |
| ENSG00000124762                                    | CDKN1A                               | cyclin-dependent kinase inhibitor 1A (p21, Cip1)                    | 1026   |
| ENSG00000100292                                    | HMOX1                                | heme oxygenase (decycling) 1                                        | 3162   |
| ENSG00000139289                                    | PHLDA1                               | pleckstrin homology-like domain, family A, member 1                 | 22822  |
| ENSG00000138166                                    | DUSP5                                | dual specificity phosphatase 5                                      | 1847   |
| ENSG00000169136                                    | ATF5                                 | activating transcription factor 5                                   | 22809  |
| ENSG00000059728                                    | MXD1                                 | MAX dimerization protein 1                                          | 4084   |
| ENSG00000048052                                    | HDAC9                                | histone deacetylase 9                                               | 9734   |
| ENSG00000085276                                    | MECOM                                | MDS1 and EVI1 complex locus                                         | 2122   |

|                                                    |                        |                                                             |        |
|----------------------------------------------------|------------------------|-------------------------------------------------------------|--------|
| ENSG00000148700                                    | ADD3                   | adducin 3 (gamma)                                           | 120    |
| ENSG00000135679                                    | MDM2                   | Mdm2, p53 E3 ubiquitin protein ligase homolog (mouse)       | 4193   |
| ENSG00000161011                                    | SQSTM1                 | sequestosome 1                                              | 8878   |
| ENSG00000105993                                    | DNAJB6                 | DnaJ (Hsp40) homolog, subfamily B, member 6                 | 10049  |
| ENSG00000161513                                    | FDXR                   | ferredoxin reductase                                        | 2232   |
| ENSG00000100889                                    | PCK2                   | phosphoenolpyruvate carboxykinase 2 (mitochondrial)         | 5106   |
| ENSG00000121931                                    | LRIF1                  | ligand dependent nuclear receptor interacting factor 1      | 55791  |
| ENSG00000063660                                    | GPC1                   | glypican 1                                                  | 2817   |
| ENSG00000240694                                    | PNMA2                  | paraneoplastic Ma antigen 2                                 | 10687  |
| ENSG00000185591                                    | SP1                    | Sp1 transcription factor                                    | 6667   |
| ENSG00000198431                                    | TXNRD1                 | thioredoxin reductase 1                                     | 7296   |
| ENSG00000108179                                    | PPIF                   | peptidylprolyl isomerase F                                  | 10105  |
| ENSG00000173846                                    | PLK3                   | polo-like kinase 3                                          | 1263   |
| ENSG00000134574                                    | DDB2                   | damage-specific DNA binding protein 2, 48kDa                | 1643   |
| ENSG00000106105                                    | GARS                   | glycyl-tRNA synthetase                                      | 2617   |
| ENSG00000142168                                    | SOD1                   | superoxide dismutase 1, soluble                             | 6647   |
| ENSG00000173614                                    | NMNAT1                 | nicotinamide nucleotide adenylyltransferase 1               | 64802  |
| ENSG00000132170                                    | PPARG                  | peroxisome proliferator-activated receptor gamma            | 5468   |
| ENSG00000153292                                    | GPR110                 | G protein-coupled receptor 110                              | 266977 |
| ENSG00000115641                                    | FHL2                   | four and a half LIM domains 2                               | 2274   |
| ENSG00000162772                                    | ATF3                   | activating transcription factor 3                           | 467    |
| ENSG00000171617                                    | ENC1                   | ectodermal-neural cortex 1 (with BTB-like domain)           | 8507   |
| ENSG00000138413                                    | IDH1                   | isocitrate dehydrogenase 1 (NADP+), soluble                 | 3417   |
| ENSG00000181222                                    | POLR2A                 | polymerase (RNA) II (DNA directed) polypeptide A, 220kDa    | 5430   |
| ENSG00000179583                                    | CIITA                  | class II, major histocompatibility complex, transactivator  | 4261   |
| ENSG00000204388                                    | HSPA1B                 | heat shock 70kDa protein 1B                                 | 3304   |
| ENSG00000135047                                    | CTSL1                  | cathepsin L1                                                | 1514   |
| ENSG00000121691                                    | CAT                    | catalase                                                    | 847    |
| ENSG00000115919                                    | KYNU                   | kynureninase                                                | 8942   |
| ENSG0000023330                                     | ALAS1                  | aminolevulinate, delta-, synthase 1                         | 211    |
| ENSG00000153879                                    | CEBPG                  | CCAAT/enhancer binding protein (C/EBP), gamma               | 1054   |
| ENSG00000181026                                    | AEN                    | apoptosis enhancing nuclease                                | 64782  |
| ENSG00000101849                                    | TBL1X                  | transducin (beta)-like 1X-linked                            | 6907   |
| ENSG00000170689                                    | HOXB9                  | homeobox B9                                                 | 3219   |
| ENSG00000160570                                    | DEDD2                  | death effector domain containing 2                          | 162989 |
| <b>Cellular component</b>                          | <b>Organelle lumen</b> | <b>GO:0043233</b>                                           |        |
| C=3209;O=58;E=39.63;R=1.46;rawP=0.0011;adjP=0.0373 |                        |                                                             |        |
| ENSG00000166123                                    | GPT2                   | glutamic pyruvate transaminase (alanine aminotransferase) 2 | 84706  |
| ENSG00000120694                                    | HSPH1                  | heat shock 105kDa/110kDa protein 1                          | 10808  |
| ENSG00000162616                                    | DNAJB4                 | DnaJ (Hsp40) homolog, subfamily B, member 4                 | 11080  |
| ENSG00000120738                                    | EGR1                   | early growth response 1                                     | 1958   |
| ENSG00000221926                                    | TRIM16                 | tripartite motif containing 16                              | 10626  |
| ENSG00000170485                                    | NPAS2                  | neuronal PAS domain protein 2                               | 4862   |
| ENSG00000002587                                    | HS3ST1                 | heparan sulfate (glucosamine) 3-O-sulfotransferase 1        | 9957   |

|                 |          |                                                            |        |
|-----------------|----------|------------------------------------------------------------|--------|
| ENSG00000164938 | TP53INP1 | tumor protein p53 inducible nuclear protein 1              | 94241  |
| ENSG00000102048 | ASB9     | ankyrin repeat and SOCS box containing 9                   | 140462 |
| ENSG00000160200 | CBS      | cystathionine-beta-synthase                                | 875    |
| ENSG00000132002 | DNAJB1   | DnaJ (Hsp40) homolog, subfamily B, member 1                | 3337   |
| ENSG00000124762 | CDKN1A   | cyclin-dependent kinase inhibitor 1A (p21, Cip1)           | 1026   |
| ENSG00000100292 | HMOX1    | heme oxygenase (decycling) 1                               | 3162   |
| ENSG00000139289 | PHLDA1   | pleckstrin homology-like domain, family A, member 1        | 22822  |
| ENSG00000138166 | DUSP5    | dual specificity phosphatase 5                             | 1847   |
| ENSG00000169136 | ATF5     | activating transcription factor 5                          | 22809  |
| ENSG00000059728 | MXD1     | MAX dimerization protein 1                                 | 4084   |
| ENSG00000048052 | HDAC9    | histone deacetylase 9                                      | 9734   |
| ENSG00000085276 | MECOM    | MDS1 and EVI1 complex locus                                | 2122   |
| ENSG00000148700 | ADD3     | adducin 3 (gamma)                                          | 120    |
| ENSG00000135679 | MDM2     | Mdm2, p53 E3 ubiquitin protein ligase homolog (mouse)      | 4193   |
| ENSG00000161011 | SQSTM1   | sequestosome 1                                             | 8878   |
| ENSG00000105993 | DNAJB6   | DnaJ (Hsp40) homolog, subfamily B, member 6                | 10049  |
| ENSG00000161513 | FDXR     | ferredoxin reductase                                       | 2232   |
| ENSG00000100889 | PCK2     | phosphoenolpyruvate carboxykinase 2 (mitochondrial)        | 5106   |
| ENSG00000121931 | LRIF1    | ligand dependent nuclear receptor interacting factor 1     | 55791  |
| ENSG00000063660 | GPC1     | glypican 1                                                 | 2817   |
| ENSG00000240694 | PNMA2    | paraneoplastic Ma antigen 2                                | 10687  |
| ENSG00000185591 | SP1      | Sp1 transcription factor                                   | 6667   |
| ENSG00000198431 | TXNRD1   | thioredoxin reductase 1                                    | 7296   |
| ENSG00000108179 | PPIF     | peptidylprolyl isomerase F                                 | 10105  |
| ENSG00000173846 | PLK3     | polo-like kinase 3                                         | 1263   |
| ENSG00000134574 | DDB2     | damage-specific DNA binding protein 2, 48kDa               | 1643   |
| ENSG00000106105 | GARS     | glycyl-tRNA synthetase                                     | 2617   |
| ENSG00000142168 | SOD1     | superoxide dismutase 1, soluble                            | 6647   |
| ENSG00000173614 | NMNAT1   | nicotinamide nucleotide adenylyltransferase 1              | 64802  |
| ENSG00000132170 | PPARG    | peroxisome proliferator-activated receptor gamma           | 5468   |
| ENSG00000153292 | GPR110   | G protein-coupled receptor 110                             | 266977 |
| ENSG00000115641 | FHL2     | four and a half LIM domains 2                              | 2274   |
| ENSG00000162772 | ATF3     | activating transcription factor 3                          | 467    |
| ENSG00000171617 | ENC1     | ectodermal-neural cortex 1 (with BTB-like domain)          | 8507   |
| ENSG00000138413 | IDH1     | isocitrate dehydrogenase 1 (NADP+), soluble                | 3417   |
| ENSG00000181222 | POLR2A   | polymerase (RNA) II (DNA directed) polypeptide A, 220kDa   | 5430   |
| ENSG00000179583 | CIITA    | class II, major histocompatibility complex, transactivator | 4261   |
| ENSG00000204388 | HSPA1B   | heat shock 70kDa protein 1B                                | 3304   |
| ENSG00000135047 | CTSL1    | cathepsin L1                                               | 1514   |
| ENSG00000121691 | CAT      | catalase                                                   | 847    |
| ENSG00000115919 | KYNU     | kynureninase                                               | 8942   |
| ENSG00000023330 | ALAS1    | aminolevulinate, delta-, synthase 1                        | 211    |
| ENSG00000153879 | CEBPG    | CCAAT/enhancer binding protein (C/EBP), gamma              | 1054   |
| ENSG00000181026 | AEN      | apoptosis enhancing nuclease                               | 64782  |
| ENSG00000120885 | CLU      | clusterin                                                  | 1191   |



|                                                    |                                |                                                             |        |
|----------------------------------------------------|--------------------------------|-------------------------------------------------------------|--------|
| ENSG00000101849                                    | TBL1X                          | transducin (beta)-like 1X-linked                            | 6907   |
| ENSG00000170689                                    | HOXB9                          | homeobox B9                                                 | 3219   |
| ENSG00000160570                                    | DEDD2                          | death effector domain containing 2                          | 162989 |
| <b>Cellular component</b>                          | <b>Membrane-enclosed lumen</b> | <b>GO:0031974</b>                                           |        |
| C=3252;O=58;E=40.16;R=1.44;rawP=0.0015;adjP=0.0373 |                                |                                                             |        |
| ENSG00000166123                                    | GPT2                           | glutamic pyruvate transaminase (alanine aminotransferase) 2 | 84706  |
| ENSG00000120694                                    | HSPH1                          | heat shock 105kDa/110kDa protein 1                          | 10808  |
| ENSG00000162616                                    | DNAJB4                         | DnaJ (Hsp40) homolog, subfamily B, member 4                 | 11080  |
| ENSG00000120738                                    | EGR1                           | early growth response 1                                     | 1958   |
| ENSG00000221926                                    | TRIM16                         | tripartite motif containing 16                              | 10626  |
| ENSG00000170485                                    | NPAS2                          | neuronal PAS domain protein 2                               | 4862   |
| ENSG00000002587                                    | HS3ST1                         | heparan sulfate (glucosamine) 3-O-sulfotransferase 1        | 9957   |
| ENSG00000164938                                    | TP53INP1                       | tumor protein p53 inducible nuclear protein 1               | 94241  |
| ENSG00000102048                                    | ASB9                           | ankyrin repeat and SOCS box containing 9                    | 140462 |
| ENSG00000160200                                    | CBS                            | cystathionine-beta-synthase                                 | 875    |
| ENSG00000132002                                    | DNAJB1                         | DnaJ (Hsp40) homolog, subfamily B, member 1                 | 3337   |
| ENSG00000124762                                    | CDKN1A                         | cyclin-dependent kinase inhibitor 1A (p21, Cip1)            | 1026   |
| ENSG00000100292                                    | HMOX1                          | heme oxygenase (decycling) 1                                | 3162   |
| ENSG00000139289                                    | PHLDA1                         | pleckstrin homology-like domain, family A, member 1         | 22822  |
| ENSG00000138166                                    | DUSP5                          | dual specificity phosphatase 5                              | 1847   |
| ENSG00000169136                                    | ATF5                           | activating transcription factor 5                           | 22809  |
| ENSG00000059728                                    | MXD1                           | MAX dimerization protein 1                                  | 4084   |
| ENSG00000048052                                    | HDAC9                          | histone deacetylase 9                                       | 9734   |
| ENSG00000085276                                    | MECOM                          | MDS1 and EVI1 complex locus                                 | 2122   |
| ENSG00000148700                                    | ADD3                           | adducin 3 (gamma)                                           | 120    |
| ENSG00000135679                                    | MDM2                           | Mdm2, p53 E3 ubiquitin protein ligase homolog (mouse)       | 4193   |
| ENSG00000161011                                    | SQSTM1                         | sequestosome 1                                              | 8878   |
| ENSG00000105993                                    | DNAJB6                         | DnaJ (Hsp40) homolog, subfamily B, member 6                 | 10049  |
| ENSG00000161513                                    | FDXR                           | ferredoxin reductase                                        | 2232   |
| ENSG00000100889                                    | PCK2                           | phosphoenolpyruvate carboxykinase 2 (mitochondrial)         | 5106   |
| ENSG00000121931                                    | LRIF1                          | ligand dependent nuclear receptor interacting factor 1      | 55791  |
| ENSG00000063660                                    | GPC1                           | glypican 1                                                  | 2817   |
| ENSG00000240694                                    | PNMA2                          | paraneoplastic Ma antigen 2                                 | 10687  |
| ENSG00000185591                                    | SP1                            | Sp1 transcription factor                                    | 6667   |
| ENSG00000198431                                    | TXNRD1                         | thioredoxin reductase 1                                     | 7296   |
| ENSG00000108179                                    | PPIF                           | peptidylprolyl isomerase F                                  | 10105  |
| ENSG00000173846                                    | PLK3                           | polo-like kinase 3                                          | 1263   |
| ENSG00000134574                                    | DDB2                           | damage-specific DNA binding protein 2, 48kDa                | 1643   |
| ENSG00000106105                                    | GARS                           | glycyl-tRNA synthetase                                      | 2617   |
| ENSG00000142168                                    | SOD1                           | superoxide dismutase 1, soluble                             | 6647   |
| ENSG00000173614                                    | NMNAT1                         | nicotinamide nucleotide adenyltransferase 1                 | 64802  |
| ENSG00000132170                                    | PPARG                          | peroxisome proliferator-activated receptor gamma            | 5468   |
| ENSG00000153292                                    | GPR110                         | G protein-coupled receptor 110                              | 266977 |
| ENSG00000115641                                    | FHL2                           | four and a half LIM domains 2                               | 2274   |

|                                                    |                |                                                                     |        |
|----------------------------------------------------|----------------|---------------------------------------------------------------------|--------|
| ENSG00000162772                                    | ATF3           | activating transcription factor 3                                   | 467    |
| ENSG00000171617                                    | ENC1           | ectodermal-neural cortex 1 (with BTB-like domain)                   | 8507   |
| ENSG00000138413                                    | IDH1           | isocitrate dehydrogenase 1 (NADP+), soluble                         | 3417   |
| ENSG00000181222                                    | POLR2A         | polymerase (RNA) II (DNA directed) polypeptide A, 220kDa            | 5430   |
| ENSG00000179583                                    | CIITA          | class II, major histocompatibility complex, transactivator          | 4261   |
| ENSG00000204388                                    | HSPA1B         | heat shock 70kDa protein 1B                                         | 3304   |
| ENSG00000135047                                    | CTSL1          | cathepsin L1                                                        | 1514   |
| ENSG00000121691                                    | CAT            | catalase                                                            | 847    |
| ENSG00000115919                                    | KYNU           | kynureninase                                                        | 8942   |
| ENSG00000153879                                    | CEBPG          | CCAAT/enhancer binding protein (C/EBP), gamma                       | 1054   |
| ENSG00000120885                                    | CLU            | clusterin                                                           | 1191   |
| ENSG00000170689                                    | HOXB9          | homeobox B9                                                         | 3219   |
| <b>Cellular component</b>                          | <b>Nucleus</b> | <b>GO:0005634</b>                                                   |        |
| C=5563;O=88;E=68.70;R=1.28;rawP=0.0025;adjP=0.0544 |                |                                                                     |        |
| ENSG00000124496                                    | TRERF1         | transcriptional regulating factor 1                                 | 55809  |
| ENSG00000091592                                    | NLRP1          | NLR family, pyrin domain containing 1                               | 22861  |
| ENSG00000134986                                    | NREP           | neuronal regeneration related protein homolog (rat)                 | 9315   |
| ENSG00000124762                                    | CDKN1A         | cyclin-dependent kinase inhibitor 1A (p21, Cip1)                    | 1026   |
| ENSG00000100292                                    | HMOX1          | heme oxygenase (decycling) 1                                        | 3162   |
| ENSG00000139289                                    | PHLDA1         | pleckstrin homology-like domain, family A, member 1                 | 22822  |
| ENSG00000169136                                    | ATF5           | activating transcription factor 5                                   | 22809  |
| ENSG00000059728                                    | MXD1           | MAX dimerization protein 1                                          | 4084   |
| ENSG00000196072                                    | BLOC1S2        | biogenesis of lysosomal organelles complex-1, subunit 2             | 282991 |
| ENSG00000135679                                    | MDM2           | Mdm2, p53 E3 ubiquitin protein ligase homolog (mouse)               | 4193   |
| ENSG00000105993                                    | DNAJB6         | DnaJ (Hsp40) homolog, subfamily B, member 6                         | 10049  |
| ENSG00000128016                                    | ZFP36          | zinc finger protein 36, C3H type, homolog (mouse)                   | 7538   |
| ENSG00000158373                                    | HIST1H2BD      | histone cluster 1, H2bd                                             | 3017   |
| ENSG00000239713                                    | APOBEC3G       | apolipoprotein B mRNA editing enzyme, catalytic polypeptide-like 3G | 60489  |
| ENSG00000116761                                    | CTH            | cystathionase (cystathionine gamma-lyase)                           | 1491   |
| ENSG00000146674                                    | IGFBP3         | insulin-like growth factor binding protein 3                        | 3486   |
| ENSG00000173846                                    | PLK3           | polo-like kinase 3                                                  | 1263   |
| ENSG00000142168                                    | SOD1           | superoxide dismutase 1, soluble                                     | 6647   |
| ENSG00000130766                                    | SESN2          | sestrin 2                                                           | 83667  |
| ENSG00000185088                                    | RPS27L         | ribosomal protein S27-like                                          | 51065  |
| ENSG00000132170                                    | PPARG          | peroxisome proliferator-activated receptor gamma                    | 5468   |
| ENSG00000153292                                    | GPR110         | G protein-coupled receptor 110                                      | 266977 |
| ENSG00000197903                                    | HIST1H2BK      | histone cluster 1, H2bk                                             | 85236  |
| ENSG00000162772                                    | ATF3           | activating transcription factor 3                                   | 467    |
| ENSG00000171617                                    | ENC1           | ectodermal-neural cortex 1 (with BTB-like domain)                   | 8507   |
| ENSG00000080546                                    | SESN1          | sestrin 1                                                           | 27244  |
| ENSG00000147130                                    | ZMYM3          | zinc finger, MYM-type 3                                             | 9203   |
| ENSG00000173110                                    | HSPA6          | heat shock 70kDa protein 6 (HSP70B')                                | 3310   |
| ENSG00000204390                                    | HSPA1L         | heat shock 70kDa protein 1-like                                     | 3305   |
| ENSG00000115919                                    | KYNU           | kynureninase                                                        | 8942   |



|                 |          |                                                                        |        |
|-----------------|----------|------------------------------------------------------------------------|--------|
| ENSG00000099860 | GADD45B  | growth arrest and DNA-damage-inducible, beta                           | 4616   |
| ENSG00000152137 | HSPB8    | heat shock 22kDa protein 8                                             | 26353  |
| ENSG00000023330 | ALAS1    | aminolevulinate, delta-, synthase 1                                    | 211    |
| ENSG00000134363 | FST      | follistatin                                                            | 10468  |
| ENSG00000120885 | CLU      | clusterin                                                              | 1191   |
| ENSG00000170689 | HOXB9    | homeobox B9                                                            | 3219   |
| ENSG00000120694 | HSPH1    | heat shock 105kDa/110kDa protein 1                                     | 10808  |
| ENSG00000156273 | BACH1    | BTB and CNC homology 1, basic leucine zipper transcription factor 1    | 571    |
| ENSG00000120738 | EGR1     | early growth response 1                                                | 1958   |
| ENSG00000074590 | NUAK1    | NUAK family, SNF1-like kinase, 1                                       | 9891   |
| ENSG00000164938 | TP53INP1 | tumor protein p53 inducible nuclear protein 1                          | 94241  |
| ENSG00000102048 | ASB9     | ankyrin repeat and SOCS box containing 9                               | 140462 |
| ENSG00000188158 | NHS      | Nance-Horan syndrome (congenital cataracts and dental anomalies)       | 4810   |
| ENSG00000160200 | CBS      | cystathionine-beta-synthase                                            | 875    |
| ENSG00000132002 | DNAJB1   | DnaJ (Hsp40) homolog, subfamily B, member 1                            | 3337   |
| ENSG00000138166 | DUSP5    | dual specificity phosphatase 5                                         | 1847   |
| ENSG00000100625 | SIX4     | SIX homeobox 4                                                         | 51804  |
| ENSG00000048052 | HDAC9    | histone deacetylase 9                                                  | 9734   |
| ENSG00000085276 | MECOM    | MDS1 and EVI1 complex locus                                            | 2122   |
| ENSG00000148700 | ADD3     | adducin 3 (gamma)                                                      | 120    |
| ENSG00000161011 | SQSTM1   | sequestosome 1                                                         | 8878   |
| ENSG00000087088 | BAX      | BCL2-associated X protein                                              | 581    |
| ENSG00000072310 | SREBF1   | sterol regulatory element binding transcription factor 1               | 6720   |
| ENSG00000116285 | ERRFI1   | ERBB receptor feedback inhibitor 1                                     | 54206  |
| ENSG00000146453 | PNLDC1   | poly(A)-specific ribonuclease (PARN)-like domain containing 1          | 154197 |
| ENSG00000121931 | LRIF1    | ligand dependent nuclear receptor interacting factor 1                 | 55791  |
| ENSG00000240694 | PNMA2    | paraneoplastic Ma antigen 2                                            | 10687  |
| ENSG00000185591 | SP1      | Sp1 transcription factor                                               | 6667   |
| ENSG00000198431 | TXNRD1   | thioredoxin reductase 1                                                | 7296   |
| ENSG00000134574 | DDB2     | damage-specific DNA binding protein 2, 48kDa                           | 1643   |
| ENSG00000173614 | NMNAT1   | nicotinamide nucleotide adenylyltransferase 1                          | 64802  |
| ENSG00000115641 | FHL2     | four and a half LIM domains 2                                          | 2274   |
| ENSG00000154556 | SORBS2   | sorbin and SH3 domain containing 2                                     | 8470   |
| ENSG00000181222 | POLR2A   | polymerase (RNA) II (DNA directed) polypeptide A, 220kDa               | 5430   |
| ENSG00000179583 | CIITA    | class II, major histocompatibility complex, transactivator             | 4261   |
| ENSG00000204388 | HSPA1B   | heat shock 70kDa protein 1B                                            | 3304   |
| ENSG00000026103 | FAS      | Fas (TNF receptor superfamily, member 6)                               | 355    |
| ENSG00000095383 | TBC1D2   | TBC1 domain family, member 2                                           | 55357  |
| ENSG00000135047 | CTSL1    | cathepsin L1                                                           | 1514   |
| ENSG00000117318 | ID3      | inhibitor of DNA binding 3, dominant negative helix-loop-helix protein | 3399   |
| ENSG00000116717 | GADD45A  | growth arrest and DNA-damage-inducible, alpha                          | 1647   |
| ENSG00000153879 | CEBPG    | CCAAT/enhancer binding protein (C/EBP), gamma                          | 1054   |
| ENSG00000181026 | AEN      | apoptosis enhancing nuclease                                           | 64782  |

|                                                    |                     |                                                                     |        |
|----------------------------------------------------|---------------------|---------------------------------------------------------------------|--------|
| ENSG00000255150                                    | EID3                | EP300 interacting inhibitor of differentiation 3                    | 493861 |
| ENSG00000101849                                    | TBL1X               | transducin (beta)-like 1X-linked                                    | 6907   |
| ENSG00000160570                                    | DEDD2               | death effector domain containing 2                                  | 162989 |
| ENSG00000166166                                    | TRMT61A             | tRNA methyltransferase 61 homolog A (S. cerevisiae)                 | 115708 |
| ENSG00000105939                                    | ZC3HAV1             | zinc finger CCCH-type, antiviral 1                                  | 56829  |
| <b>Cellular component</b>                          | <b>Nuclear part</b> | <b>GO:004428</b>                                                    |        |
| C=2948;O=52;E=36.40;R=1.43;rawP=0.0036;adjP=0.0696 |                     |                                                                     |        |
| ENSG00000120694                                    | HSPH1               | heat shock 105kDa/110kDa protein 1                                  | 10808  |
| ENSG00000162616                                    | DNAJB4              | DnaJ (Hsp40) homolog, subfamily B, member 4                         | 11080  |
| ENSG00000120738                                    | EGR1                | early growth response 1                                             | 1958   |
| ENSG00000221926                                    | TRIM16              | tripartite motif containing 16                                      | 10626  |
| ENSG00000170485                                    | NPAS2               | neuronal PAS domain protein 2                                       | 4862   |
| ENSG00000164938                                    | TP53INP1            | tumor protein p53 inducible nuclear protein 1                       | 94241  |
| ENSG00000102048                                    | ASB9                | ankyrin repeat and SOCS box containing 9                            | 140462 |
| ENSG00000160200                                    | CBS                 | cystathionine-beta-synthase                                         | 875    |
| ENSG00000132002                                    | DNAJB1              | DnaJ (Hsp40) homolog, subfamily B, member 1                         | 3337   |
| ENSG00000124762                                    | CDKN1A              | cyclin-dependent kinase inhibitor 1A (p21, Cip1)                    | 1026   |
| ENSG00000100292                                    | HMOX1               | heme oxygenase (decycling) 1                                        | 3162   |
| ENSG00000139289                                    | PHLDA1              | pleckstrin homology-like domain, family A, member 1                 | 22822  |
| ENSG00000138166                                    | DUSP5               | dual specificity phosphatase 5                                      | 1847   |
| ENSG00000169136                                    | ATF5                | activating transcription factor 5                                   | 22809  |
| ENSG00000059728                                    | MXD1                | MAX dimerization protein 1                                          | 4084   |
| ENSG00000048052                                    | HDAC9               | histone deacetylase 9                                               | 9734   |
| ENSG00000085276                                    | MECOM               | MDS1 and EVI1 complex locus                                         | 2122   |
| ENSG00000160117                                    | ANKLE1              | ankyrin repeat and LEM domain containing 1                          | 126549 |
| ENSG00000148700                                    | ADD3                | adducin 3 (gamma)                                                   | 120    |
| ENSG00000135679                                    | MDM2                | Mdm2, p53 E3 ubiquitin protein ligase homolog (mouse)               | 4193   |
| ENSG00000161011                                    | SQSTM1              | sequestosome 1                                                      | 8878   |
| ENSG00000105993                                    | DNAJB6              | DnaJ (Hsp40) homolog, subfamily B, member 6                         | 10049  |
| ENSG00000072310                                    | SREBF1              | sterol regulatory element binding transcription factor 1            | 6720   |
| ENSG00000121931                                    | LRIF1               | ligand dependent nuclear receptor interacting factor 1              | 55791  |
| ENSG00000239713                                    | APOBEC3G            | apolipoprotein B mRNA editing enzyme, catalytic polypeptide-like 3G | 60489  |
| ENSG00000240694                                    | PNMA2               | paraneoplastic Ma antigen 2                                         | 10687  |
| ENSG00000185591                                    | SP1                 | Sp1 transcription factor                                            | 6667   |
| ENSG00000198431                                    | TXNRD1              | thioredoxin reductase 1                                             | 7296   |
| ENSG00000173846                                    | PLK3                | polo-like kinase 3                                                  | 1263   |
| ENSG00000134574                                    | DDB2                | damage-specific DNA binding protein 2, 48kDa                        | 1643   |
| ENSG00000142168                                    | SOD1                | superoxide dismutase 1, soluble                                     | 6647   |
| ENSG00000173614                                    | NMNAT1              | nicotinamide nucleotide adenyltransferase 1                         | 64802  |
| ENSG00000132170                                    | PPARG               | peroxisome proliferator-activated receptor gamma                    | 5468   |
| ENSG00000153292                                    | GPR110              | G protein-coupled receptor 110                                      | 266977 |
| ENSG00000115641                                    | FHL2                | four and a half LIM domains 2                                       | 2274   |
| ENSG00000162772                                    | ATF3                | activating transcription factor 3                                   | 467    |
| ENSG00000171617                                    | ENC1                | ectodermal-neural cortex 1 (with BTB-like domain)                   | 8507   |

|                                                    |                      |                                                            |        |
|----------------------------------------------------|----------------------|------------------------------------------------------------|--------|
| ENSG00000181222                                    | POLR2A               | polymerase (RNA) II (DNA directed) polypeptide A, 220kDa   | 5430   |
| ENSG00000179583                                    | CIITA                | class II, major histocompatibility complex, transactivator | 4261   |
| ENSG00000204388                                    | HSPA1B               | heat shock 70kDa protein 1B                                | 3304   |
| ENSG00000173110                                    | HSPA6                | heat shock 70kDa protein 6 (HSP70B')                       | 3310   |
| ENSG00000204390                                    | HSPA1L               | heat shock 70kDa protein 1-like                            | 3305   |
| ENSG00000115919                                    | KYNU                 | kynureninase                                               | 8942   |
| ENSG0000023330                                     | ALAS1                | aminolevulinate, delta-, synthase 1                        | 211    |
| ENSG00000153879                                    | CEBPG                | CCAAT/enhancer binding protein (C/EBP), gamma              | 1054   |
| ENSG00000181026                                    | AEN                  | apoptosis enhancing nuclease                               | 64782  |
| ENSG00000101849                                    | TBL1X                | transducin (beta)-like 1X-linked                           | 6907   |
| ENSG00000170689                                    | HOXB9                | homeobox B9                                                | 3219   |
| ENSG00000160570                                    | DEDD2                | death effector domain containing 2                         | 162989 |
| <b>Cellular component</b>                          | <b>Nuclear lumen</b> | <b>GO:0031981</b>                                          |        |
| C=2632;O=47;E=32.50;R=1.45;rawP=0.0047;adjP=0.0818 |                      |                                                            |        |
| ENSG00000120694                                    | HSPH1                | heat shock 105kDa/110kDa protein 1                         | 10808  |
| ENSG00000162616                                    | DNAJB4               | DnaJ (Hsp40) homolog, subfamily B, member 4                | 11080  |
| ENSG00000120738                                    | EGR1                 | early growth response 1                                    | 1958   |
| ENSG00000221926                                    | TRIM16               | tripartite motif containing 16                             | 10626  |
| ENSG00000170485                                    | NPAS2                | neuronal PAS domain protein 2                              | 4862   |
| ENSG00000164938                                    | TP53INP1             | tumor protein p53 inducible nuclear protein 1              | 94241  |
| ENSG00000102048                                    | ASB9                 | ankyrin repeat and SOCS box containing 9                   | 140462 |
| ENSG00000160200                                    | CBS                  | cystathionine-beta-synthase                                | 875    |
| ENSG00000132002                                    | DNAJB1               | DnaJ (Hsp40) homolog, subfamily B, member 1                | 3337   |
| ENSG00000124762                                    | CDKN1A               | cyclin-dependent kinase inhibitor 1A (p21, Cip1)           | 1026   |
| ENSG00000100292                                    | HMOX1                | heme oxygenase (decycling) 1                               | 3162   |
| ENSG00000139289                                    | PHLDA1               | pleckstrin homology-like domain, family A, member 1        | 22822  |
| ENSG00000138166                                    | DUSP5                | dual specificity phosphatase 5                             | 1847   |
| ENSG00000169136                                    | ATF5                 | activating transcription factor 5                          | 22809  |
| ENSG00000059728                                    | MXD1                 | MAX dimerization protein 1                                 | 4084   |
| ENSG00000048052                                    | HDAC9                | histone deacetylase 9                                      | 9734   |
| ENSG00000085276                                    | MECOM                | MDS1 and EVI1 complex locus                                | 2122   |
| ENSG00000148700                                    | ADD3                 | adducin 3 (gamma)                                          | 120    |
| ENSG00000135679                                    | MDM2                 | Mdm2, p53 E3 ubiquitin protein ligase homolog (mouse)      | 4193   |
| ENSG00000161011                                    | SQSTM1               | sequestosome 1                                             | 8878   |
| ENSG00000105993                                    | DNAJB6               | DnaJ (Hsp40) homolog, subfamily B, member 6                | 10049  |
| ENSG00000121931                                    | LRIF1                | ligand dependent nuclear receptor interacting factor 1     | 55791  |
| ENSG00000240694                                    | PNMA2                | paraneoplastic Ma antigen 2                                | 10687  |
| ENSG00000185591                                    | SP1                  | Sp1 transcription factor                                   | 6667   |
| ENSG00000198431                                    | TXNRD1               | thioredoxin reductase 1                                    | 7296   |
| ENSG00000173846                                    | PLK3                 | polo-like kinase 3                                         | 1263   |
| ENSG00000134574                                    | DDB2                 | damage-specific DNA binding protein 2, 48kDa               | 1643   |
| ENSG00000142168                                    | SOD1                 | superoxide dismutase 1, soluble                            | 6647   |
| ENSG00000173614                                    | NMNAT1               | nicotinamide nucleotide adenyltransferase 1                | 64802  |
| ENSG00000132170                                    | PPARG                | peroxisome proliferator-activated receptor gamma           | 5468   |
| ENSG00000153292                                    | GPR110               | G protein-coupled receptor 110                             | 266977 |

|                 |        |                                                            |        |
|-----------------|--------|------------------------------------------------------------|--------|
| ENSG00000115641 | FHL2   | four and a half LIM domains 2                              | 2274   |
| ENSG00000162772 | ATF3   | activating transcription factor 3                          | 467    |
| ENSG00000171617 | ENC1   | ectodermal-neural cortex 1 (with BTB-like domain)          | 8507   |
| ENSG00000181222 | POLR2A | polymerase (RNA) II (DNA directed) polypeptide A, 220kDa   | 5430   |
| ENSG00000179583 | CIITA  | class II, major histocompatibility complex, transactivator | 4261   |
| ENSG00000204388 | HSPA1B | heat shock 70kDa protein 1B                                | 3304   |
| ENSG00000115919 | KYNU   | kynureninase                                               | 8942   |
| ENSG0000023330  | ALAS1  | aminolevulinate, delta-, synthase 1                        | 211    |
| ENSG00000153879 | CEBPG  | CCAAT/enhancer binding protein (C/EBP), gamma              | 1054   |
| ENSG00000181026 | AEN    | apoptosis enhancing nuclease                               | 64782  |
| ENSG00000101849 | TBL1X  | transducin (beta)-like 1X-linked                           | 6907   |
| ENSG00000170689 | HOXB9  | homeobox B9                                                | 3219   |
| ENSG00000160570 | DEDD2  | death effector domain containing 2                         | 162989 |

User file and parameters: User file: textAreaUpload.txt, Organism: hsapiens, Id type: ensembl\_gene\_stable\_id, Ref Set: illumina\_humanref\_8\_v2, Significance Level: Top10, Statistics Test: Hypergeometric, MTC: BH  
For each GO category, the first row lists its sub-root (biological process, molecular function, or cellular component), category name, and corresponding GO ID.  
The second row lists number of reference genes in the category (C), number of genes in the gene set and also in the category (O), expected number in the category (E), Ratio of enrichment (R), p value from hypergeometric test

**Table S3.** String network analysis of DEGs. Browse interactions in tabular form.

| #node1                        | node2     | node1_string_<br>internal_id | node2_string_<br>internal_id | node1_external_id    | node2_external_id    | homology | experimentally<br>determined<br>interaction | database<br>annotated | combined<br>core |
|-------------------------------|-----------|------------------------------|------------------------------|----------------------|----------------------|----------|---------------------------------------------|-----------------------|------------------|
| <b>6h post SFN treatment</b>  |           |                              |                              |                      |                      |          |                                             |                       |                  |
| SQSTM1                        | MAP1LC3B  | 1857860                      | 1846025                      | 9606.ENSP00000374455 | 9606.ENSP00000268607 | 0        | 0,999                                       | 0                     | 0,999            |
| GCLM                          | GCLC      | 1855202                      | 1843208                      | 9606.ENSP00000359258 | 9606.ENSP00000229416 | 0        | 0,978                                       | 0,9                   | 0,997            |
| HSP90AA1                      | HSPA6     | 1851814                      | 1849273                      | 9606.ENSP00000335153 | 9606.ENSP00000310219 | 0        | 0,901                                       | 0,9                   | 0,989            |
| GARS                          | ASNS      | 1857811                      | 1842325                      | 9606.ENSP00000373918 | 9606.ENSP00000175506 | 0        | 0,986                                       | 0                     | 0,986            |
| HSP90AA1                      | HSPH1     | 1851814                      | 1850070                      | 9606.ENSP00000335153 | 9606.ENSP00000318687 | 0        | 0,677                                       | 0,9                   | 0,966            |
| DNAJB6                        | DNAJB1    | 1845081                      | 1844287                      | 9606.ENSP00000262177 | 9606.ENSP00000254322 | 0,701    | 0,32                                        | 0,9                   | 0,929            |
| HSPA6                         | DNAJB1    | 1849273                      | 1844287                      | 9606.ENSP00000310219 | 9606.ENSP00000254322 | 0        | 0,301                                       | 0,9                   | 0,927            |
| HSPH1                         | DNAJB1    | 1850070                      | 1844287                      | 9606.ENSP00000318687 | 9606.ENSP00000254322 | 0        | 0,255                                       | 0,9                   | 0,922            |
| HSPH1                         | DNAJB6    | 1850070                      | 1845081                      | 9606.ENSP00000318687 | 9606.ENSP00000262177 | 0        | 0,235                                       | 0,9                   | 0,92             |
| HSPA6                         | DNAJB6    | 1849273                      | 1845081                      | 9606.ENSP00000310219 | 9606.ENSP00000262177 | 0        | 0,235                                       | 0,9                   | 0,92             |
| HSPH1                         | HSPA6     | 1850070                      | 1849273                      | 9606.ENSP00000318687 | 9606.ENSP00000310219 | 0,786    | 0,211                                       | 0,9                   | 0,917            |
| HSP90AA1                      | DNAJB6    | 1851814                      | 1845081                      | 9606.ENSP00000335153 | 9606.ENSP00000262177 | 0        | 0,168                                       | 0,9                   | 0,913            |
| HSP90AA1                      | DNAJB1    | 1851814                      | 1844287                      | 9606.ENSP00000335153 | 9606.ENSP00000254322 | 0        | 0,168                                       | 0,9                   | 0,913            |
| MTHFD2                        | ALDH1L2   | 1858157                      | 1844615                      | 9606.ENSP00000377617 | 9606.ENSP00000258494 | 0        | 0,074                                       | 0,9                   | 0,903            |
| DEDD2                         | HSPA6     | 1864303                      | 1849273                      | 9606.ENSP00000470082 | 9606.ENSP00000310219 | 0        | 0                                           | 0,9                   | 0,9              |
| DEDD2                         | HSPH1     | 1864303                      | 1850070                      | 9606.ENSP00000470082 | 9606.ENSP00000318687 | 0        | 0                                           | 0,9                   | 0,9              |
| DEDD2                         | DNAJB1    | 1864303                      | 1844287                      | 9606.ENSP00000470082 | 9606.ENSP00000254322 | 0        | 0                                           | 0,9                   | 0,9              |
| DEDD2                         | HSP90AA1  | 1864303                      | 1851814                      | 9606.ENSP00000470082 | 9606.ENSP00000335153 | 0        | 0                                           | 0,9                   | 0,9              |
| DEDD2                         | DNAJB6    | 1864303                      | 1845081                      | 9606.ENSP00000470082 | 9606.ENSP00000262177 | 0        | 0                                           | 0,9                   | 0,9              |
| LPAR1                         | F2R       | 1853763                      | 1850333                      | 9606.ENSP00000351755 | 9606.ENSP00000321326 | 0        | 0                                           | 0,9                   | 0,899            |
| LPAR1                         | ADORA1    | 1853763                      | 1849083                      | 9606.ENSP00000351755 | 9606.ENSP00000308549 | 0,686    | 0                                           | 0,9                   | 0,899            |
| LPAR3                         | F2R       | 1855308                      | 1850333                      | 9606.ENSP00000359643 | 9606.ENSP00000321326 | 0        | 0                                           | 0,9                   | 0,899            |
| PSAT1                         | PSPH      | 1856523                      | 1846450                      | 9606.ENSP00000365773 | 9606.ENSP00000275605 | 0        | 0                                           | 0,9                   | 0,899            |
| TXNRD1                        | CTH       | 1861975                      | 1855373                      | 9606.ENSP00000434516 | 9606.ENSP00000359976 | 0        | 0                                           | 0,9                   | 0,899            |
| LPAR3                         | LPAR1     | 1855308                      | 1853763                      | 9606.ENSP00000359643 | 9606.ENSP00000351755 | 0,949    | 0                                           | 0,9                   | 0,899            |
| LPAR3                         | ADORA1    | 1855308                      | 1849083                      | 9606.ENSP00000359643 | 9606.ENSP00000308549 | 0,635    | 0                                           | 0,9                   | 0,899            |
| DNAJA1                        | HSP90AA1  | 1857095                      | 1851814                      | 9606.ENSP00000369127 | 9606.ENSP00000335153 | 0        | 0,886                                       | 0                     | 0,886            |
| BAG3                          | HSPB8     | 1854947                      | 1846754                      | 9606.ENSP00000358081 | 9606.ENSP00000281938 | 0        | 0,866                                       | 0                     | 0,865            |
| HSP90AA1                      | CHORDC1   | 1851814                      | 1850131                      | 9606.ENSP00000335153 | 9606.ENSP00000319255 | 0        | 0,815                                       | 0                     | 0,815            |
| HSPA1A                        | HSP90AA1  | 1856351                      | 1851814                      | 9606.ENSP00000364802 | 9606.ENSP00000335153 | 0        | 0,812                                       | 0                     | 0,812            |
| HSPA1L                        | HSP90AA1  | 1856352                      | 1851814                      | 9606.ENSP00000364805 | 9606.ENSP00000335153 | 0        | 0,812                                       | 0                     | 0,812            |
| HSPA1B                        | HSP90AA1  | 1856350                      | 1851814                      | 9606.ENSP00000364801 | 9606.ENSP00000335153 | 0        | 0,812                                       | 0                     | 0,812            |
| SQSTM1                        | SESN2     | 1857860                      | 1844194                      | 9606.ENSP00000374455 | 9606.ENSP00000253063 | 0        | 0,804                                       | 0                     | 0,804            |
| CTH                           | GCLC      | 1855373                      | 1843208                      | 9606.ENSP00000359976 | 9606.ENSP00000229416 | 0        | 0                                           | 0,8                   | 0,8              |
| CTH                           | GCLM      | 1855373                      | 1855202                      | 9606.ENSP00000359976 | 9606.ENSP00000359258 | 0        | 0                                           | 0,8                   | 0,8              |
| SQSTM1                        | BAG3      | 1857860                      | 1854947                      | 9606.ENSP00000374455 | 9606.ENSP00000358081 | 0        | 0,706                                       | 0                     | 0,706            |
| HSPA1A                        | DNAJB1    | 1856351                      | 1844287                      | 9606.ENSP00000364802 | 9606.ENSP00000254322 | 0        | 0,69                                        | 0                     | 0,69             |
| HSPA1A                        | BAG3      | 1856351                      | 1854947                      | 9606.ENSP00000364802 | 9606.ENSP00000358081 | 0        | 0,685                                       | 0                     | 0,685            |
| SQSTM1                        | HSPA6     | 1857860                      | 1849273                      | 9606.ENSP00000374455 | 9606.ENSP00000310219 | 0        | 0,57                                        | 0                     | 0,569            |
| DNAJB1                        | ZFP36     | 1844287                      | 1843925                      | 9606.ENSP00000254322 | 9606.ENSP00000248673 | 0        | 0,567                                       | 0                     | 0,567            |
| LRIF1                         | PPARG     | 1855096                      | 1847090                      | 9606.ENSP00000358778 | 9606.ENSP00000287820 | 0        | 0,567                                       | 0                     | 0,567            |
| HSPA1A                        | PPP1R15A  | 1856351                      | 1842391                      | 9606.ENSP00000364802 | 9606.ENSP00000200453 | 0        | 0,564                                       | 0                     | 0,564            |
| DNAJA1                        | DNAJB1    | 1857095                      | 1844287                      | 9606.ENSP00000369127 | 9606.ENSP00000254322 | 0,818    | 0,506                                       | 0                     | 0,506            |
| DNAJA1                        | DNAJB4    | 1857095                      | 1855345                      | 9606.ENSP00000369127 | 9606.ENSP00000359799 | 0,827    | 0,506                                       | 0                     | 0,506            |
| BAG3                          | HSPA6     | 1854947                      | 1849273                      | 9606.ENSP00000358081 | 9606.ENSP00000310219 | 0        | 0,469                                       | 0                     | 0,469            |
| DNAJB4                        | HSPH1     | 1855345                      | 1850070                      | 9606.ENSP00000359799 | 9606.ENSP00000318687 | 0        | 0,409                                       | 0                     | 0,409            |
| <b>12h post SFN treatment</b> |           |                              |                              |                      |                      |          |                                             |                       |                  |
| FTL                           | FTH1      | 1856660                      | 1846327                      | 9606.ENSP00000366525 | 9606.ENSP00000273550 | 0,965    | 0,994                                       | 0,9                   | 0,999            |
| FST                           | INHBA     | 1844467                      | 1843613                      | 9606.ENSP00000256759 | 9606.ENSP00000242208 | 0        | 0,98                                        | 0,8                   | 0,995            |
| <b>24h post SFN treatment</b> |           |                              |                              |                      |                      |          |                                             |                       |                  |
| MDM2                          | CDKN1A    | 1861282                      | 1843736                      | 9606.ENSP00000417281 | 9606.ENSP00000244741 | 0        | 0,997                                       | 0                     | 0,996            |
| MDM2                          | BBC3      | 1861282                      | 1860479                      | 9606.ENSP00000417281 | 9606.ENSP00000404503 | 0        | 0,983                                       | 0                     | 0,982            |
| CLU                           | BAX       | 1849761                      | 1847402                      | 9606.ENSP00000315130 | 9606.ENSP00000293288 | 0        | 0,982                                       | 0                     | 0,982            |
| HOXB9                         | BTG2      | 1849176                      | 1847240                      | 9606.ENSP00000309439 | 9606.ENSP00000290551 | 0        | 0,576                                       | 0,9                   | 0,955            |
| GADD45A                       | GADD45B   | 1855383                      | 1842495                      | 9606.ENSP00000360025 | 9606.ENSP00000215631 | 0,96     | 0,576                                       | 0,9                   | 0,955            |
| SP1                           | CDKN1A    | 1851138                      | 1843736                      | 9606.ENSP00000329357 | 9606.ENSP00000244741 | 0        | 0,567                                       | 0,9                   | 0,954            |
| NPAS2                         | TBL1X     | 1852092                      | 1842681                      | 9606.ENSP00000338283 | 9606.ENSP00000217964 | 0        | 0,545                                       | 0,9                   | 0,952            |
| GADD45A                       | CDKN1A    | 1855383                      | 1843736                      | 9606.ENSP00000360025 | 9606.ENSP00000244741 | 0        | 0,915                                       | 0                     | 0,915            |
| HSPH1                         | TNFRSF21  | 1850070                      | 1847799                      | 9606.ENSP00000318687 | 9606.ENSP00000296861 | 0        | 0                                           | 0,9                   | 0,9              |
| TXNRD1                        | TBL1X     | 1861975                      | 1842681                      | 9606.ENSP00000434516 | 9606.ENSP00000217964 | 0        | 0                                           | 0,9                   | 0,9              |
| TNFRSF21                      | TBL1X     | 1847799                      | 1842681                      | 9606.ENSP00000296861 | 9606.ENSP00000217964 | 0        | 0                                           | 0,9                   | 0,9              |
| ITGB2                         | PLAT      | 1848511                      | 1842802                      | 9606.ENSP00000303242 | 9606.ENSP00000220809 | 0        | 0                                           | 0,9                   | 0,9              |
| ALAS1                         | TBL1X     | 1849161                      | 1842681                      | 9606.ENSP00000309259 | 9606.ENSP00000217964 | 0        | 0                                           | 0,9                   | 0,9              |
| SP1                           | TBL1X     | 1851138                      | 1842681                      | 9606.ENSP00000329357 | 9606.ENSP00000217964 | 0        | 0                                           | 0,9                   | 0,9              |
| SOD1                          | CAT       | 1846132                      | 1843587                      | 9606.ENSP00000270142 | 9606.ENSP00000241052 | 0        | 0                                           | 0,9                   | 0,899            |
| FHL2                          | TBL1X     | 1850494                      | 1842681                      | 9606.ENSP00000322909 | 9606.ENSP00000217964 | 0        | 0                                           | 0,9                   | 0,899            |
| BBC3                          | SP1       | 1860479                      | 1851138                      | 9606.ENSP00000404503 | 9606.ENSP00000329357 | 0        | 0                                           | 0,9                   | 0,899            |
| SP1                           | BAX       | 1851138                      | 1847402                      | 9606.ENSP00000329357 | 9606.ENSP00000293288 | 0        | 0                                           | 0,9                   | 0,899            |
| HIST1H2BK                     | HIST1H2BD | 1853439                      | 1847163                      | 9606.ENSP00000349430 | 9606.ENSP00000289316 | 0,988    | 0                                           | 0,9                   | 0,899            |

|        |           |         |         |                      |                      |       |       |      |       |
|--------|-----------|---------|---------|----------------------|----------------------|-------|-------|------|-------|
| MDM2   | ATF3      | 1861282 | 1852803 | 9606.ENSP00000417281 | 9606.ENSP00000344352 | 0     | 0,812 | 0    | 0,812 |
| SP1    | EGR1      | 1851138 | 1843543 | 9606.ENSP00000329357 | 9606.ENSP00000239938 | 0,646 | 0,807 | 0    | 0,806 |
| IL7R   | IL11      | 1848815 | 1845567 | 9606.ENSP00000306157 | 9606.ENSP00000264563 | 0     | 0     | 0,8  | 0,8   |
| SREBF1 | SP1       | 1853255 | 1851138 | 9606.ENSP00000348069 | 9606.ENSP00000329357 | 0     | 0,798 | 0    | 0,798 |
| POLR2A | CDKN1A    | 1849743 | 1843736 | 9606.ENSP00000314949 | 9606.ENSP00000244741 | 0     | 0,723 | 0    | 0,722 |
| ITGB2  | ITGB4     | 1848511 | 1842390 | 9606.ENSP00000303242 | 9606.ENSP00000200181 | 0,819 | 0     | 0,72 | 0,72  |
| SQSTM1 | BAG3      | 1857860 | 1854947 | 9606.ENSP00000374455 | 9606.ENSP00000358081 | 0     | 0,706 | 0    | 0,706 |
| FAS    | TNFRSF10B | 1853242 | 1846494 | 9606.ENSP00000347979 | 9606.ENSP00000276431 | 0,636 | 0,667 | 0    | 0,667 |
| SQSTM1 | SOD1      | 1857860 | 1846132 | 9606.ENSP00000374455 | 9606.ENSP00000270142 | 0     | 0,654 | 0    | 0,654 |
| IGFBP3 | CTSL1     | 1857331 | 1852924 | 9606.ENSP00000370473 | 9606.ENSP00000345344 | 0     | 0,576 | 0    | 0,575 |
| DDB2   | CDKN1A    | 1844481 | 1843736 | 9606.ENSP00000256996 | 9606.ENSP00000244741 | 0     | 0,576 | 0    | 0,575 |
| CDKN1A | GADD45B   | 1843736 | 1842495 | 9606.ENSP00000244741 | 9606.ENSP00000215631 | 0     | 0,576 | 0    | 0,575 |
| ID3    | SREBF1    | 1856143 | 1853255 | 9606.ENSP00000363689 | 9606.ENSP00000348069 | 0     | 0,576 | 0    | 0,575 |
| MDM2   | EGR1      | 1861282 | 1843543 | 9606.ENSP00000417281 | 9606.ENSP00000239938 | 0     | 0,576 | 0    | 0,575 |
| BAG3   | SOD1      | 1854947 | 1846132 | 9606.ENSP00000358081 | 9606.ENSP00000270142 | 0     | 0,573 | 0    | 0,573 |
| FHL2   | ITGB2     | 1850494 | 1848511 | 9606.ENSP00000322909 | 9606.ENSP00000303242 | 0     | 0,57  | 0    | 0,569 |
| BBC3   | BAX       | 1860479 | 1847402 | 9606.ENSP00000404503 | 9606.ENSP00000293288 | 0     | 0,57  | 0    | 0,569 |
| SESN1  | SQSTM1    | 1859742 | 1857860 | 9606.ENSP00000393762 | 9606.ENSP00000374455 | 0     | 0,567 | 0    | 0,567 |
| SREBF1 | INSIG1    | 1853255 | 1852851 | 9606.ENSP00000348069 | 9606.ENSP00000344741 | 0     | 0,567 | 0    | 0,567 |
| SQSTM1 | FAS       | 1857860 | 1853242 | 9606.ENSP00000374455 | 9606.ENSP00000347979 | 0     | 0,564 | 0    | 0,564 |
| MDM2   | GADD45A   | 1861282 | 1855383 | 9606.ENSP00000417281 | 9606.ENSP00000360025 | 0     | 0,564 | 0    | 0,563 |
| MDM2   | RPS27L    | 1861282 | 1851302 | 9606.ENSP00000417281 | 9606.ENSP00000331019 | 0     | 0,564 | 0    | 0,563 |

**Table S4.** List of primers used for the qPCR

| <b>Target gene</b> | <b>Forward primer (5' to 3')</b> | <b>Reverse primer (5' to 3')</b> |
|--------------------|----------------------------------|----------------------------------|
| <b>GAPDH</b>       | GGAGTCAACGGATTTGGTC              | GGCAACAATATCCACTTTACC            |
| <b>NQO1</b>        | TCTATGCCATGAACTTCAATCC           | CTTCAGTTTACCTGTGATGTC            |
| <b>HO-1</b>        | AAAGTGCAAGATTCTGCC               | GAGTGTAAGGACCCATCGG              |
| <b>GCLM</b>        | TCTGGAAACTCCCTGACC               | CCTTGAATGAATGGAGTTCCC            |
| <b>GCLC</b>        | AAACCCAAACCATCCTACC              | AATATAGAAGTAGCCTCCTTCC           |
| <b>TXNRD1</b>      | AGACTCTCGAAATTATGGATGG           | CCCAATCATGCTTAACTGTCTC           |
| <b>GADD45b</b>     | ACATCGCCCTGCAAATCC               | ACACCCGCACGATGTTGAT              |
| <b>CDKN1A</b>      | GTCTTGTACCCTTGTGCC               | GGTAGAAATCTGTCATGCTGG            |
| <b>ATF3</b>        | CTGCAGAAAGAGTCGGAG               | CTGGAGTCCTCCCATTCTG              |
| <b>BAX</b>         | GACGGCAACTTCAACTGG               | GAAGTCCAATGTCCAGCC               |
| <b>EGR1</b>        | CAGAAGGACAAGAAAGCAGAC            | GGATGGGTATGAGGTGGT               |
| <b>FAS</b>         | CATAAGCCCTGTCCTCCA               | GTCTGTGTACTCCTTCCCT              |
| <b>HSPA1A</b>      | GCCAACAAGATCACCATCAC             | GTCCTCCGCTTTGTACTTCTC            |
| <b>ITGB4</b>       | GTATTGCGACTATGAGATGAAGG          | GGAGGAGACGACATTGAAGG             |
